# Supplementary material for: A comparison of the mineral element content of 70 different varieties of pear fruit (Pyrus ussuriensis) in China
Source: PeerJ. 2023 May 8;11:e15328. doi: 10.7717/peerj.15328 (PMC10174059; doi:10.7717/peerj.15328)
Supplement: Supplemental Information 1 — All measurement and analysis data. [file peerj-11-15328-s001.xls]

## Sheet: Sheet1
Peel	Na	Mg	Al	P	K	Ca	Cr	Fe	Cu	Zn	Cd	Pb	Total contents	Pulp	Na	Mg	Al	P	K	Ca	Cr	Fe	Cu	Zn	Cd	Pb			Fruit	Na	Mg	Al	P	K	Ca	Cr	Fe	Cu	Zn	Cd	Pb	Total contents				Na	Mg	Al	P
SPL	9.13	242	9.32	197.7	1943	363.3	0.18	21.46	1.73	1.04	0.0111	0.03	2788.9	SPL	3.72	69	2.37	135.3	1818	40	0.11	2.54	0.4	0.45	0.0074	0.0181			SPL	12.85	311	11.69	333	3761	403.3	0.29	24	2.13	1.49	0.0185	0.0481	4860.82			Original native varieties	12.9341	231.424	12.3715	289.31
DXL	11.79	277.7	13.38	219.8	1257	263.3	0.35	9.3	1.17	0.98	0.0028	0.033	2054.81	DXL	3.27	55.3	1.44	92.2	943	35.6	0.04	2.78	0.33	0.37	0.0033	0.0142			DXL	15.06	333	14.82	312	2200	298.9	0.39	12.08	1.5	1.35	0.0061	0.0472	3189.15			Improved varieties	17.5584	248.166	14.2189	318.401
XPXL	7.78	208.2	5.64	193	1680	261.4	0.34	7.67	0.89	1.79	0.002	0.023	2366.74	XPXL	2.59	56.6	0.62	128.8	1390	35.3	0.09	1.83	0.18	0.4	0.0024	0.012			XPXL	10.37	264.8	6.26	321.8	3070	296.7	0.43	9.5	1.07	2.19	0.0044	0.035	3983.16			Wiild resources	18.0667	284.888	21.275	482.587
WXL	11.49	162.2	9.17	159.3	1942	228.6	0.21	9.54	0.73	0.92	0.0042	0.0231	2524.19	WXL	3.28	68.3	1.26	86.5	1228	70.9	0.1	3.13	0.37	0.42	0.003	0.0122			WXL	14.77	230.5	10.43	245.8	3170	299.5	0.31	12.67	1.1	1.34	0.0072	0.0353	3986.46
PDXL	6.69	139.97	6.5	160.77	1499.6	146.12	0.11	11.44	1.13	1.12	0.0063	0.0361	1973.49	PDXL	6.4	69.12	4.35	153.56	1246.55	39.18	0.1	3.38	0.45	0.73	0.0047	0.0223			PDXL	13.09	209.09	10.85	314.33	2746.15	185.3	0.21	14.82	1.58	1.85	0.011	0.0584	3497.34
PDX1	11.55	254.1	16.5	222.6	1669	455.5	0.36	16.72	1.35	1.32	0.0059	0.0653	2649.07	PDX1	3.93	69.3	1.87	89.1	1272	43.4	0.12	4.34	0.22	0.4	0.0025	0.0119			PDX1	15.48	323.4	18.37	311.7	2941	498.9	0.48	21.06	1.57	1.72	0.0084	0.0772	4133.77
PDX2	11.76	234.3	16.8	194.4	1064	355.2	0.44	14.73	1.71	1.5	0.007	0.0841	1894.93	PDX2	2.74	62.5	2.21	124.23	1088.67	38.93	0.09	4.05	0.47	0.53	0.0028	0.0161			PDX2	14.5	296.8	19.01	318.63	2152.67	394.13	0.53	18.78	2.18	2.03	0.0098	0.1002	3219.37
HGL	8.95	223.1	8.32	238.2	1961	362.4	0.44	11.75	1.46	0.95	0.0038	0.0382	2816.61	HGL	3.06	82.8	1.83	129.1	1716	45.7	0.08	4.13	0.41	0.33	0.0027	0.013			HGL	12.01	305.9	10.15	367.3	3677	408.1	0.52	15.88	1.87	1.28	0.0065	0.0512	4800.07
HLL	9.6	117	6.35	388.4	2643	189.4	0.35	8.75	0.94	1.53	0.0069	0.0379	3365.36	HLL	4.6	97	2.11	149.3	1585	62.2	0.12	6.72	0.37	0.52	0.0027	0.0133			HLL	14.2	214	8.46	537.7	4228	251.6	0.47	15.47	1.31	2.05	0.0096	0.0512	5273.32
ML	8.06	219.2	8.16	189	1745	114.8	0.15	7.48	1.3	1.37	0.0081	0.0291	2294.56	ML	2.85	96.4	1.39	149.8	1886	46.5	0.04	7.24	0.72	0.57	0.0044	0.012			ML	10.91	315.6	9.55	338.8	3631	161.3	0.19	14.72	2.02	1.94	0.0125	0.0411	4486.08
QPCL	7.83	132.3	8.26	186.3	1349	225.8	0.31	9.7	0.92	0.94	0.0031	0.0422	1921.41	QPCL	2.92	46.4	2.44	84.2	626	49.2	0.13	4.23	0.27	0.31	0.0012	0.011			QPCL	10.75	178.7	10.7	270.5	1975	275	0.44	13.93	1.19	1.25	0.0043	0.0532	2737.52
HXL	8.63	199.9	8.91	249.6	2357	143.5	0.31	9.68	1.64	1.91	0.0041	0.0363	2981.12	HXL	3.05	41.4	1.67	78.6	908	23.5	0.08	7.21	0.5	0.37	0.0014	0.011			HXL	11.68	241.3	10.58	328.2	3265	167	0.39	16.89	2.14	2.28	0.0055	0.0473	4045.51
LHHXSL	8.25	236.6	7.96	186.3	1343	833.4	0.34	11.86	1.83	1.19	0.003	0.0314	2630.76	LHHXSL	2.87	98.3	1.76	108.1	1402	59.7	0.08	3.41	0.4	0.31	0.001	0.0129			LHHXSL	11.12	334.9	9.72	294.4	2745	893.1	0.42	15.27	2.23	1.5	0.004	0.0443	4307.71
HHGL	6.35	133.79	6.34	139.34	2173.17	252.75	0.1	4.5	1.04	1	0.0054	0.0529	2718.44	HHGL	5.43	83.24	5.62	126.7	2614.28	94.71	0.09	3.86	0.77	0.95	0.005	0.0512			HHGL	11.78	217.03	11.96	266.04	4787.45	347.46	0.19	8.36	1.81	1.95	0.0104	0.1041	5654.14
XCZL	6.49	72.2	13.13	73.05	885.26	115.69	0.1	3.56	0.61	0.7	0.0032	0.0519	1170.85	XCZL	5.33	47.49	3.87	80.83	1343.3	46.41	0.09	2.61	0.42	0.56	0.0034	0.0235			XCZL	11.82	119.69	17	153.88	2228.56	162.1	0.19	6.17	1.03	1.26	0.0066	0.0754	2701.78
CBZL	7.14	132.83	7.59	114.13	1796.13	318.05	0.11	5.1	0.85	1.07	0.0071	0.0464	2383.05	CBZL	6.89	86.78	5.25	131.15	2113.73	101.21	0.12	3.43	0.54	0.91	0.0071	0.0268			CBZL	14.03	219.61	12.84	245.28	3909.86	419.26	0.23	8.53	1.39	1.98	0.0142	0.0732	4833.1
BLL	6.13	137.46	6.03	164.54	2000.88	159.67	0.09	4.35	1	1.07	0.0028	0.0329	2481.26	BLL	5.85	89.64	5.22	126.65	1899.24	66.98	0.1	3.75	0.74	0.95	0.0021	0.0253			BLL	11.98	227.1	11.25	291.19	3900.12	226.65	0.19	8.1	1.74	2.02	0.0049	0.0582	4680.4
LDL	5.91	176.87	6.87	151.09	1350.35	295.95	0.09	4.68	0.88	0.92	0.0044	0.0447	1993.66	LDL	10.4	107.33	6.81	141.95	1648.46	88.38	0.17	4.23	0.48	0.73	0.003	0.0318			LDL	16.31	284.2	13.68	293.04	2998.81	384.33	0.26	8.91	1.36	1.65	0.0074	0.0765	4002.63
HMXSX	6	150.36	7.99	212.04	1475.62	145.1	0.09	5.35	1.32	1.34	0.0098	0.0438	2005.26	HMXSX	6.72	69.37	6.36	117.01	1415.03	45.98	0.11	2.89	0.73	0.77	0.0054	0.0345			HMXSX	12.72	219.73	14.35	329.05	2890.65	191.08	0.2	8.24	2.05	2.11	0.0152	0.0783	3670.27
SLGZL	5.32	104.69	6.21	90.88	1393.91	71.67	0.08	4.1	0.66	0.93	0.0039	0.04	1678.49	SLGZL	4.18	59.38	3.01	78.27	1219.46	28.93	0.08	2.46	0.39	0.6	0.0027	0.0206			SLGZL	9.5	164.07	9.22	169.15	2613.37	100.6	0.16	6.56	1.05	1.53	0.0066	0.0606	3075.28
JBL	6.91	106.16	6.61	153.72	2082.38	119.95	0.11	4.04	0.96	1.68	0.006	0.0392	2482.57	JBL	9.21	77.32	5.5	237.07	2520.2	68.17	0.17	4.42	1.02	1.41	0.008	0.0466			JBL	16.12	183.48	12.11	390.79	4602.58	188.12	0.28	8.46	1.98	3.09	0.014	0.0858	5407.11
XHTL	5.08	120.72	5.66	129.9	1873.95	100.22	0.08	3.56	0.85	0.91	0.0042	0.0324	2240.97	XHTL	6.22	59.95	5.2	174.22	2239.96	38.32	0.11	2.92	0.42	0.56	0.0036	0.0211			XHTL	11.3	180.67	10.86	304.12	4113.91	138.54	0.19	6.48	1.27	1.47	0.0078	0.0535	4768.87
DXSL	5.65	165.97	6.84	118.53	1548.31	188.05	0.08	4.68	1.02	0.83	0.0021	0.0492	2040.01	DXSL	5.29	72.05	4.14	147.57	2538.34	60.21	0.11	3.47	0.65	0.51	0.0014	0.0258			DXSL	10.94	238.02	10.98	266.1	4086.65	248.26	0.19	8.15	1.67	1.34	0.0035	0.075	4872.38
YHL	7.05	134.24	6.1	90.6	975.21	304.07	0.11	4.26	0.38	0.84	0.005	0.047	1522.91	YHL	5.96	107.19	5.01	100.45	1541.15	116.5	0.11	2.95	0.28	0.74	0.0068	0.0294			YHL	13.01	241.43	11.11	191.05	2516.36	420.57	0.22	7.21	0.66	1.58	0.0118	0.0764	3403.29
FXL	5.98	128.58	6.11	142.36	1275.45	106.51	0.09	5.05	1.41	1.42	0.005	0.044	1673.01	FXL	7.06	52.09	5.77	107.92	1141.39	36.02	0.11	2.85	0.57	0.75	0.0025	0.0254			FXL	13.04	180.67	11.88	250.28	2416.84	142.53	0.2	7.9	1.98	2.17	0.0075	0.0694	3027.57
QXSL	6.59	143.24	9.54	188.12	1453.34	174.42	0.11	5.93	1.12	1.33	0.0052	0.0757	1983.82	QXSL	6.66	58.79	5.04	74.24	953.7	52.81	0.11	3.69	0.45	0.63	0.0019	0.0329			QXSL	13.25	202.03	14.58	262.36	2407.04	227.23	0.22	9.62	1.57	1.96	0.0071	0.1086	3139.98
QPHL	8.08	166.06	7.91	138.77	1902.59	269.39	0.14	6.66	1.17	1.08	0.0077	0.0516	2501.91	QPHL	5.32	60.96	4.13	109.56	1548.93	69.36	0.09	2.93	0.53	0.66	0.0046	0.0273			QPHL	13.4	227.02	12.04	248.33	3451.52	338.75	0.23	9.59	1.7	1.74	0.0123	0.0789	4304.41
QHL	6.93	103.35	4.96	195.52	1798.39	109.12	0.12	3.41	0.63	0.81	0.0024	0.0447	2223.29	QHL	6.6	125.08	7.6	142.72	1395.77	363.96	0.11	4.94	0.83	1.1	0.0023	0.0237			QHL	13.53	228.43	12.56	338.24	3194.16	473.08	0.23	8.35	1.46	1.91	0.0047	0.0684	4272.02
YBDJBL	6.4	162.53	7.74	205.52	2218.57	160.51	0.1	4.76	1.48	1.43	0.0028	0.044	2769.09	YBDJBL	8.54	126.95	5.77	257.22	2042.13	79.19	0.13	3.76	0.85	1.18	0.0026	0.0256			YBDJBL	14.94	289.48	13.51	462.74	4260.7	239.7	0.23	8.52	2.33	2.61	0.0054	0.0696	5294.84
HLJHGL	6	140.55	12.74	155.34	1736.05	351.43	0.1	4.41	0.94	1.46	0.0094	0.044	2409.07	HLJHGL	5.83	105.87	4.19	105.49	1516.5	92.58	0.09	2.78	0.37	0.85	0.0051	0.0299			HLJHGL	11.83	246.42	16.93	260.83	3252.55	444.01	0.19	7.19	1.31	2.31	0.0145	0.0739	4243.66
TL	5.79	84.88	5.99	76.07	1736.39	206.84	0.09	3.24	0.7	0.67	0.005	0.0336	2120.7	TL	7.7	63.72	6.51	53.64	1897.61	104.59	0.13	2.94	0.5	0.59	0.0058	0.027			TL	13.49	148.6	12.5	129.71	3634	311.43	0.22	6.18	1.2	1.26	0.0108	0.0606	4258.66
HPXL	9.95	115.66	8.69	187.37	2071.78	83.14	0.14	6.65	0.65	1.23	0.0081	0.0616	2485.33	HPXL	7.93	60.5	5.11	130.84	1184.66	42.88	0.14	3.88	0.32	0.65	0.0033	0.0291			HPXL	17.88	176.16	13.8	318.21	3256.44	126.02	0.28	10.53	0.97	1.88	0.0114	0.0907	3922.27
BLXL	5.85	153.36	5.33	139.88	2125.25	141.93	0.09	6.99	1.03	0.92	0.0049	0.0298	2580.66	BLXL	6.19	87.88	4.82	123.8	1975.94	62.65	0.1	3.05	0.71	0.74	0.0044	0.0222			BLXL	12.04	241.24	10.15	263.68	4101.19	204.58	0.19	10.04	1.74	1.66	0.0093	0.052	4846.57
MTHL	6.27	149.95	7.42	195.56	2019.78	64.05	0.11	15.83	1.05	1.1	0.0034	0.0386	2461.16	MTHL	5.9	75.08	4.7	125.47	1609.77	28.73	0.1	4.45	0.56	0.68	0.0027	0.0207			MTHL	12.17	225.03	12.12	321.03	3629.55	92.78	0.21	20.28	1.61	1.78	0.0061	0.0593	4316.63
AL	6.59	171.2	6.23	148.22	1916.88	157.85	0.12	9.02	0.88	0.78	0.0022	0.039	2417.81	AL	4.57	74.38	3.75	116.74	1593.57	41.52	0.08	2.94	0.43	0.57	0.0014	0.0218			AL	11.16	245.58	9.98	264.96	3510.45	199.37	0.2	11.96	1.31	1.35	0.0036	0.0608	4256.38
HTL	6.34	137.76	6.85	145.35	1864	211.88	0.1	8.44	0.77	1.17	0.0064	0.0411	2382.71	HTL	7.41	106.26	5.15	150.26	1882.61	98.18	0.12	3.99	0.57	0.94	0.0052	0.0231			HTL	13.75	244.02	12	295.61	3746.61	310.06	0.22	12.43	1.34	2.11	0.0116	0.0642	4638.23
TXDYXL	5.94	99.24	8.64	127.48	1567.74	187.07	0.1	10.51	0.74	1.14	0.0066	0.0479	2008.65	TXDYXL	6.98	64.64	4.64	90.34	1153.46	79.47	0.12	5.11	0.44	0.57	0.0045	0.0309			TXDYXL	12.92	163.88	13.28	217.82	2721.2	266.54	0.22	15.62	1.18	1.71	0.0111	0.0788	3414.46
SL	7.85	109.1	11.65	113.79	1517.43	307.76	0.12	12.02	0.7	0.82	0.0052	0.0485	2081.29	SL	5.78	68.09	4.75	136.1	1971.25	99.08	0.09	3.53	0.43	0.49	0.0046	0.0217			SL	13.63	177.19	16.4	249.89	3488.68	406.84	0.21	15.55	1.13	1.31	0.0098	0.0702	4370.91
DWBKSL	5.12	110.51	10.77	118.27	1553.01	160.7	0.08	4.01	0.71	0.87	0.0066	0.0317	1964.09	DWBKSL	5.98	65.27	4.04	87.27	1241.2	62.16	0.1	3.01	0.38	0.59	0.0043	0.0228			DWBKSL	11.1	175.78	14.81	205.54	2794.21	222.86	0.18	7.02	1.09	1.46	0.0109	0.0545	3434.12
DNGL	9.14	218.3	6.13	187.8	1000	419.1	0.33	8.2	1.17	1.16	0.0034	0.0264	1851.36	DNGL	2.76	67.9	1.44	77.2	908	59.5	0.05	5.07	0.32	0.38	0.003	0.013			DNGL	11.9	286.2	7.57	265	1908	478.6	0.38	13.27	1.49	1.54	0.0064	0.0394	2974
FX	13.13	230.7	11.74	269.7	2310	391.2	0.44	13.25	1.05	1.62	0.0063	0.0495	3242.89	FX	3.54	99.3	0.78	69.3	917	51.9	0.08	2.68	0.12	0.27	0.0019	0.0116			FX	16.67	330	12.52	339	3227	443.1	0.52	15.93	1.17	1.89	0.0082	0.0611	4387.87
YY351L	9.69	198.8	12.24	171.8	1148	638.5	0.41	13.88	1.56	1.34	0.0052	0.0752	2196.3	YY351L	2.45	53.6	1.23	116.4	1174	62.6	0.1	5.68	0.37	0.34	0.0021	0.0124			YY351L	12.14	252.4	13.47	288.2	2322	701.1	0.51	19.56	1.93	1.68	0.0073	0.0876	3613.08
QYL	51.46	285	14.97	261	2251	301.3	0.36	11.81	2.73	1.67	0.0032	0.035	3181.34	QYL	14.21	78.3	15.13	197.5	1918	51.1	0.14	5.59	0.75	0.49	0.002	0.0142			QYL	65.67	363.3	30.1	458.5	4169	352.4	0.5	17.4	3.48	2.16	0.0052	0.0492	5462.56
JXL	10.72	238.5	18.31	265.8	2167	137.8	0.47	18.49	2.78	1.7	0.0044	0.0735	2861.65	JXL	2.62	62.2	4	83.3	883	25.5	0.06	3.71	0.4	0.33	0.0023	0.013			JXL	13.34	300.7	22.31	349.1	3050	163.3	0.53	22.2	3.18	2.03	0.0067	0.0865	3926.78
HJQL	44.23	259.5	6.76	361	3099	192	0.46	10.21	1.79	2.06	0.0037	0.026	3977.04	HJQL	5.62	56.9	1.26	127.3	1597	29.1	0.16	4.64	0.58	0.49	0.0015	0.011			HJQL	49.85	316.4	8.02	488.3	4696	221.1	0.62	14.85	2.37	2.55	0.0052	0.037	5800.1
LXL	8.78	240.2	16.43	238.5	1809	370.3	0.42	14.1	1.7	1.72	0.0082	0.04	2701.2	LXL	3.22	65.2	0.93	148	1190	58.1	0.12	4.42	0.5	0.47	0.0041	0.012			LXL	12	305.4	17.36	386.5	2999	428.4	0.54	18.52	2.2	2.19	0.0123	0.052	4172.17
DXS	4.67	60.78	3.11	184.19	1749.62	43.01	0.08	3.57	0.81	0.74	0.0053	0.0373	2050.62	DXS	4.76	116.74	6.06	176.03	1580.53	129.48	0.07	5.86	1.23	1.17	0.0042	0.022			DXS	9.43	177.52	9.17	360.22	3330.15	172.49	0.15	9.43	2.04	1.91	0.0095	0.0593	4072.58
YY1L	5.1	118.6	8.64	130.5	886.23	94.6	0.08	17.2	1.08	1.01	0.0026	0.0482	1263.09	YY1L	7	49.55	5.29	96.88	923.26	31.77	0.12	2.9	0.62	0.7	0.0017	0.0256			YY1L	12.1	168.15	13.93	227.38	1809.49	126.37	0.2	20.1	1.7	1.71	0.0043	0.0738	2381.21
CXL	7.08	101.41	6.72	183.06	1568.52	93.23	0.09	6.4	1.61	1.55	0.0036	0.0549	1969.73	CXL	7.94	45	12.78	82.32	794.64	51.17	0.14	6.09	0.6	0.66	0.0018	0.0395			CXL	15.02	146.41	19.5	265.38	2363.16	144.4	0.23	12.49	2.21	2.21	0.0054	0.0944	2971.11
WX	6.77	148.98	8.79	155.82	1409.04	279.44	0.11	7.18	1.03	1.29	0.0068	0.0594	2018.52	WX	6.58	62.96	4.4	108.21	1072.13	48.26	0.11	2.64	0.52	0.62	0.0037	0.0264			WX	13.35	211.94	13.19	264.03	2481.17	327.7	0.22	9.82	1.55	1.91	0.0105	0.0858	3324.98
NGL	6.73	203.21	7.8	123.85	1287.47	453.06	0.11	5.71	0.96	1.61	0.0097	0.0449	2090.56	NGL	7.14	124.39	4.65	69.64	1074.37	83.51	0.12	3.57	0.5	0.99	0.0073	0.0273			NGL	13.87	327.6	12.45	193.49	2361.84	536.57	0.23	9.28	1.46	2.6	0.017	0.0722	3459.48
XXSL	5.97	125.09	9.32	144.94	1939.67	216.57	0.1	5.01	0.94	1.59	0.0054	0.0525	2449.26	XXSL	7.02	80.38	5.6	150.34	1538.85	81.8	0.11	2.99	0.59	0.89	0.0039	0.0244			XXSL	12.99	205.47	14.92	295.28	3478.52	298.37	0.21	8	1.53	2.48	0.0093	0.0769	4317.86
DN5L	5.67	150.25	6.49	123.03	898.72	165.02	0.09	3.97	1.06	1.03	0.0039	0.0389	1355.37	DN5L	5.91	58.25	3.58	88.89	922.01	36.85	0.14	3.8	0.63	0.73	0.0025	0.0276			DN5L	11.58	208.5	10.07	211.92	1820.73	201.87	0.23	7.77	1.69	1.76	0.0064	0.0665	2476.19
ZXSL	7.73	131.79	7.3	142.32	1919.36	323.59	0.12	4.66	0.9	1.11	0.003	0.0484	2538.93	ZXSL	6.86	63.82	5.6	132.95	1367.72	92.62	0.12	2.77	0.44	0.56	0.0014	0.0226			ZXSL	14.59	195.61	12.9	275.27	3287.08	416.21	0.24	7.43	1.34	1.67	0.0044	0.071	4212.42
JXSL	5.33	127.44	9.02	143.51	1609.52	308.26	0.09	4.84	1.04	0.88	0.0025	0.0378	2209.97	JXSL	5.98	96.2	4.84	184.78	1771.5	81.97	0.1	3.24	0.93	0.98	0.0026	0.0299			JXSL	11.31	223.64	13.86	328.29	3381.02	390.23	0.19	8.08	1.97	1.86	0.0051	0.0677	4360.52
DML	5.13	160.55	8.75	142.1	1491.36	158.65	0.09	5.66	0.96	1.5	0.0069	0.0757	1974.83	DML	8.05	90.08	4.85	176.1	2061.65	54.24	0.13	3.25	0.53	1.03	0.0051	0.0382			DML	13.18	250.63	13.6	318.2	3553.01	212.89	0.22	8.91	1.49	2.53	0.012	0.1139	4374.79
TXL	5.6	104.4	7.38	114.27	1069.98	200.52	0.09	5.31	0.8	1.49	0.0054	0.0467	1509.89	TXL	6.08	83.32	5.64	106.07	1167.65	83.16	0.1	3.18	0.62	1.05	0.006	0.0352			TXL	11.68	187.72	13.02	220.34	2237.63	283.68	0.19	8.49	1.42	2.54	0.0114	0.0819	2966.8
JTL	6.43	187.82	7.26	275.62	1773.26	205.13	0.1	5.42	2.5	1.79	0.0045	0.0494	2465.38	JTL	6.51	69.75	4.94	239.6	1768.34	53.9	0.11	3.36	1.21	0.94	0.0028	0.0381			JTL	12.94	257.57	12.2	515.22	3541.6	259.03	0.21	8.78	3.71	2.73	0.0073	0.0875	4614.08
SSDL	8.98	251.7	9.8	287.9	3209	261.7	0.36	12.3	1.94	2	0.0074	0.0346	4045.72	SSDL	4.72	95	4.91	199.4	2421	64.6	0.13	6.57	0.84	0.82	0.0037	0.0142			SSDL	13.7	346.7	14.71	487.3	5630	326.3	0.49	18.87	2.78	2.82	0.0111	0.0488	6843.73
SSHMSL	17.31	106.9	9.93	282	3125	92.6	0.38	12.06	2.6	1.9	0.0099	0.0417	3650.73	SSHMSL	6.81	108.8	3.38	278.7	2817	55	0.11	5.19	1.13	0.94	0.0044	0.0135			SSHMSL	24.12	215.7	13.31	560.7	5942	147.6	0.49	17.25	3.73	2.84	0.0143	0.0552	6927.81
SSTESL	9.6	163.4	7.97	197.9	1892	154.8	0.42	9.34	1.29	1.76	0.0039	0.0322	2438.52	SSTESL	3.59	62.9	3	136.6	1650	32.5	0.04	5.74	0.44	0.69	0.0023	0.0197			SSTESL	13.19	226.3	10.97	334.5	3542	187.3	0.46	15.08	1.73	2.45	0.0062	0.0519	4334.04
SSKWSL	7.98	198.5	9.28	253.4	2847	134.6	0.35	14.05	2.02	1.72	0.0066	0.0258	3468.93	SSKWSL	3.28	107.5	3.66	283.8	3079	39.2	0.1	5.02	0.88	0.71	0.0029	0.0261			SSKWSL	11.26	306	12.94	537.2	5926	173.8	0.45	19.07	2.9	2.43	0.0095	0.0519	6992.11
DNSL	11.65	248.6	7.59	239.7	1953	155.6	0.44	10.3	1.78	2.86	0.0039	0.0372	2631.56	DNSL	5.44	96.7	1.44	202.95	2050	40.9	0.11	5.79	0.83	0.66	0.0032	0.0154			DNSL	17.09	345.3	9.03	442.65	4003	196.5	0.55	16.09	2.61	3.52	0.0071	0.0526	5036.4
HLSL	12.1	182.8	9.81	235	2599	181.1	0.44	12.17	1.7	1.72	0.0075	0.03	3235.88	HLSL	4.39	88.5	1.55	184.6	2479	48.9	0.06	5.54	0.58	0.56	0.0073	0.0143			HLSL	16.49	271.3	11.36	419.6	5078	230	0.5	17.71	2.28	2.28	0.0148	0.0443	6049.58
SWSL	13.64	250.4	10.17	219.4	2821	167.5	0.46	15.68	2.14	2.69	0.0076	0.037	3503.12	SWSL	6.6	125.7	2.47	221.8	2560	54.2	0.06	6.97	1.05	1.46	0.0037	0.017			SWSL	20.24	376.1	12.64	441.2	5381	221.7	0.52	22.65	3.19	4.15	0.0113	0.054	6483.46
ZLTSL1	10.4	202.5	30.62	268.4	2594	284.7	0.42	18.99	2.69	2.51	0.0049	0.044	3415.28	ZLTSL1	3.48	73.4	7.96	225.6	1772	69.8	0.11	4.9	0.96	0.84	0.0054	0.0195			ZLTSL1	13.88	275.9	38.58	494	4366	354.5	0.53	23.89	3.65	3.35	0.0103	0.0635	5574.35
ZLTSL2	12.34	134	26.96	286.5	2012	119.2	0.41	17.12	1.49	2.53	0.0075	0.052	2612.61	ZLTSL2	4.46	54.6	5.53	220.4	1589	41.3	0.2	7.52	0.6	0.7	0.0041	0.019			ZLTSL2	16.8	188.6	32.49	506.9	3601	160.5	0.61	24.64	2.09	3.23	0.0116	0.071	4536.94
ZLTSL3	19.69	172.96	28.28	350.1	3008.3	318.54	0.37	12.79	1.91	3.34	0.0111	0.014	3916.31	ZLTSL3	5.14	119.5	3.88	316.9	2680	74.5	0.11	8.59	0.57	1.3	0.016	0.043			ZLTSL3	24.83	292.46	32.16	667	5688.3	393.04	0.48	21.38	2.48	4.64	0.0271	0.057	7126.85
HEBSL1	10.54	254.9	47.35	243.1	2438	130.8	0.22	27.83	1.52	4.39	0.0044	0.074	3158.73	HEBSL1	5.71	70.1	4.27	243.5	1954	33	0.14	7.41	0.59	0.76	0.0026	0.018			HEBSL1	16.25	325	51.62	486.6	4392	163.8	0.36	35.24	2.11	5.15	0.007	0.092	5478.23
HEBSL2	15.15	167.2	12.38	229.3	2015	150.7	0.41	13.36	1.25	2.14	0.0067	0.04	2606.94	HEBSL2	13.8	82.1	3.11	184.1	2115	65.9	0.16	8.27	0.73	0.64	0.007	0.0182			HEBSL2	28.95	249.3	15.49	413.4	4130	216.6	0.57	21.63	1.98	2.78	0.0137	0.0582	5080.77
Mean	9.39943	166.9	10.1787	188.747	1838.06	226.423	0.218	9.22929	1.27357	1.43571	0.00540714	0.0435443		Mean	5.66971	78.2337	4.22057	141.592	1615.81	63.506	0.106714	4.26829	0.573286	0.693714	0.00379571	0.0226086			Mean	15.0691	245.134	14.3993	330.339	3453.87	289.929	0.324714	13.4976	1.84686	2.12943	0.00920286	0.0661529	4366.62
MAX	51.46	285	47.35	388.4	3209	833.4	0.47	27.83	2.78	4.39	0.0111	0.0841		MAX	14.21	126.95	15.13	316.9	3079	363.96	0.2	8.59	1.23	1.46	0.016	0.0512			MAX	65.67	376.1	51.62	667	5942	893.1	0.62	35.24	3.73	5.15	0.0271	0.1139
Min	4.67	60.78	3.11	73.05	885.26	43.01	0.08	3.24	0.38	0.67	0.002	0.014		Min	2.45	41.4	0.62	53.64	626	23.5	0.04	1.83	0.12	0.27	0.001	0.011			Min	9.43	119.69	6.26	129.71	1809.49	92.78	0.15	6.17	0.66	1.25	0.0035	0.035
Range	46.79	224.22	44.24	315.35	2323.74	790.39	0.39	24.59	2.4	3.72	0.0091	0.0701		Range	11.76	85.55	14.51	263.26	2453	340.46	0.16	6.76	1.11	1.19	0.015	0.0402			Range	56.24	256.41	45.36	537.29	4132.51	800.32	0.47	29.07	3.07	3.9	0.0236	0.0789
SD	7.24965	54.1355	6.70818	65.6149	547.905	132.26	0.143294	5.06021	0.547167	0.641978	0.0022216	0.0137259		SD	2.27731	21.9297	2.42682	57.5276	543.388	42.9679	0.0301293	1.54953	0.234531	0.264517	0.00225328	0.00906658			SD	8.13238	59.3175	7.17833	106.419	981.959	140.277	0.141983	5.86885	0.678952	0.750268	0.004088	0.0176636
CV	0.771286	0.324359	0.65904	0.347633	0.298088	0.584129	0.657311	0.548277	0.429632	0.447149	0.410865	0.315218		CV	0.401662	0.280311	0.574998	0.406292	0.336295	0.676596	0.282336	0.363033	0.4091	0.381305	0.593638	0.401024			CV	0.539671	0.24198	0.49852	0.322152	0.284307	0.483834	0.437256	0.434808	0.367626	0.352333	0.444209	0.267013
Range of change	11.0193	4.68904	15.2251	5.31691	3.62492	19.3769	5.875	8.58951	7.31579	6.55224	5.55	6.00714		Range of change	5.8	3.06643	24.4032	5.9079	4.91853	15.4877	5	4.69399	10.25	5.40741	16	4.65455			Range of change	6.96394	3.14228	8.24601	5.14224	3.2838	9.626	4.13333	5.71151	5.65152	4.12	7.74286	3.25429
	Na	Mg	Al	P	K	Ca	Cr	Fe	Cu	Zn	Cd	Pb			Na	Mg	Al	P	K	Ca	Cr	Fe	Cu	Zn	Cd	Pb				Na	Mg	Al	P	K	Ca	Cr	Fe	Cu	Zn	Cd	Pb
[truncated: 8 more columns]

## Sheet: Sheet2
Variety (peel)	Na			mean	SD	Mg			mean	SD	Al			mean	SD	P			mean	SD	K			mean	SD	Ca			mean	SD	Cr			mean	SD	Fe			mean	SD	Cu			平均	标准差	Zn			mean
SPL	8.48	9.78	9.13	9.13	0.530723	231.1	253	241.9	242	8.94092	7.27	11.33	9.36	9.32	1.65773	179.45	179.49	234.16	197.7	25.7811	1825.89	2060	1943.11	1943	95.575	312.3	415.3	362.3	363.3	42.0555	0.24	0.119	0.181	0.18	0.0494031	20.25	22.67	21.46	21.46	0.987961	1.77	1.67	1.75	1.73	0.0432049	1.1	0.97	1.05	1.04
DXL	11.15	12.4	11.82	11.79	0.510751	266.9	288.7	277.5	277.7	8.90094	11.33	15.43	13.38	13.38	1.67382	201.55	238	219.85	219.8	14.8807	1374.02	1140.71	1256.27	1257	95.2498	212.1	314.45	263.35	263.3	41.7842	0.295	0.413	0.351	0.353	0.0481941	8.08	10.49	9.33	9.3	0.984107	1.15	1.23	1.13	1.17	0.0432049	0.93	1.03	0.98	0.98
XPXL	7.13	8.39	7.82	7.78	0.51517	197.4	219.2	208	208.2	8.90094	3.58	7.65	5.69	5.64	1.66195	174.71	211.21	193.08	193	14.9012	1562.95	1797.05	1680	1680	95.5709	210.23	312.5	261.47	261.4	41.7516	0.278	0.399	0.334	0.337	0.0494436	6.45	8.9	7.66	7.67	1.00023	0.83	0.95	0.89	0.89	0.0489898	1.73	1.84	1.8	1.79
WXL	10.87	12.12	11.48	11.49	0.510359	173.3	151.29	162.01	162.2	8.98655	7.13	11.23	9.15	9.17	1.67388	141.07	177.51	159.32	159.3	14.8766	1824.95	2059.03	1942.02	1942	95.5628	177.35	279.78	228.67	228.6	41.8169	0.146	0.315	0.157	0.206	0.0772054	8.31	10.78	9.53	9.54	1.0084	0.78	0.67	0.74	0.73	0.0454606	0.97	0.88	0.91	0.92
PDXL	6.18	7.15	6.74	6.69	0.397576	131.69	145.97	142.25	139.97	6.0486	8.16	4.95	6.39	6.5	1.31278	146.66	175.09	160.56	160.77	11.6074	1415.35	1591.76	1491.69	1499.6	72.2359	101.12	189.95	147.29	146.12	36.2741	0.14	0.07	0.12	0.11	0.0294392	11.58	11.31	11.43	11.44	0.110454	1.18	1.08	1.13	1.13	0.0408248	1.17	1.07	1.12	1.12
PDX1	12.14	10.94	11.57	11.55	0.490102	243.13	265.07	254.1	254.1	8.95697	14.43	18.54	16.53	16.5	1.67803	204.42	240.83	222.55	222.6	14.8644	1551.89	1786.13	1668.98	1669	95.6281	404.33	506.71	455.56	455.533	41.7965	0.302	0.421	0.369	0.364	0.04871	15.47	17.98	16.71	16.72	1.02473	1.3	1.41	1.34	1.35	0.0454606	1.38	1.27	1.31	1.32
PDX2	11.13	12.42	11.73	11.76	0.527067	223.32	245.41	234.17	234.3	9.01867	18.84	14.76	16.8	16.8	1.66565	176.14	212.61	194.45	194.4	14.8889	1181.13	946.95	1063.92	1064	95.6036	304.02	303.97	457.61	355.2	72.4148	0.379	0.497	0.432	0.436	0.0482563	13.5	15.99	14.7	14.73	1.01676	1.77	1.68	1.68	1.71	0.0424264	1.55	1.46	1.49	1.5
HGL	8.35	9.61	8.89	8.95	0.51614	233.98	212.25	223.07	223.1	8.87126	6.26	9.8	8.9	8.32	1.50226	219.95	246.47	248.18	238.2	12.9236	1843.86	2078.2	1960.94	1961	95.6689	311.15	413.61	362.44	362.4	41.8291	0.375	0.5	0.436	0.437	0.0510359	10.57	12.95	11.73	11.75	0.971734	1.4	1.51	1.47	1.46	0.0454606	1	0.91	0.94	0.95
HLL	10.25	8.99	9.56	9.6	0.51517	106.04	127.93	117.03	117	8.93658	4.32	8.42	6.31	6.35	1.67406	370.19	406.68	388.33	388.4	14.8971	2525.69	2760.06	2643.25	2643	95.6813	138.15	240.62	189.43	189.4	41.8332	0.295	0.411	0.347	0.351	0.0474412	7.54	9.95	8.76	8.75	0.983904	0.98	0.9	0.94	0.94	0.0326599	1.49	1.58	1.52	1.53
ML	8.69	7.45	8.04	8.06	0.506425	230.13	208.42	219.05	219.2	8.86371	6.12	10.15	8.21	8.16	1.64562	207.23	170.75	189.02	189	14.8929	1627.89	1862.21	1744.9	1745	95.6608	166.06	63.61	114.73	114.8	41.8251	0.085	0.211	0.142	0.146	0.051517	6.26	8.71	7.47	7.48	1.00023	1.35	1.27	1.28	1.3	0.0355903	1.32	1.41	1.38	1.37
QPCL	7.21	8.48	7.8	7.83	0.518909	143.09	121.39	132.42	132.3	8.85939	6.21	10.29	8.28	8.26	1.66571	168.05	204.53	186.32	186.3	14.8929	1231.89	1466.25	1348.86	1349	95.6771	174.54	277.03	225.83	225.8	41.8414	0.366	0.246	0.303	0.305	0.0490102	8.52	10.9	9.68	9.7	0.971734	0.97	0.88	0.91	0.92	0.0374166	0.9	1	0.92	0.94
HXL	8.05	9.25	8.59	8.63	0.490714	188.99	210.83	199.88	199.9	8.91615	6.87	10.97	8.89	8.91	1.67388	231.36	267.81	249.63	249.6	14.8807	2239.89	2474.13	2356.98	2357	95.6281	92.32	195.51	142.67	143.5	42.1312	0.248	0.372	0.307	0.309	0.0506425	9.47	9.93	9.64	9.68	0.189912	1.6	1.56	1.76	1.64	0.0864099	1.96	1.87	1.9	1.91
LHHXSL	8.9	7.64	8.21	8.25	0.51517	247.48	225.68	236.64	236.6	8.89986	5.92	10.01	7.95	7.96	1.66975	168.06	204.55	186.29	186.3	14.897	1225.87	1460.14	1342.99	1343	95.6403	885.41	781.53	833.26	833.4	42.4089	0.276	0.395	0.337	0.336	0.0485867	11.65	12.09	11.84	11.86	0.180185	1.8	1.78	1.91	1.83	0.0571548	1.14	1.23	1.2	1.19
HHGL	6.95	5.78	6.32	6.35	0.478121	142.77	125.7	132.9	133.79	6.99716	7.95	4.69	6.38	6.34	1.33119	126.69	153.48	137.85	139.34	10.9876	2261.28	2078.94	2179.29	2173.17	74.5657	210.4	291.73	256.12	252.75	33.2882	0.14	0.07	0.09	0.1	0.0294392	4.37	4.75	4.38	4.5	0.176824	1.09	1	1.03	1.04	0.0374166	1.04	0.95	1.01	1
XCZL	5.82	7.03	6.62	6.49	0.502461	79.79	64.15	72.66	72.2	6.39328	14.73	11.58	13.08	13.13	1.28647	60.21	87.1	71.84	73.05	11.0111	805.91	977.93	871.94	885.26	70.8557	105.13	128.71	113.23	115.69	9.78239	0.15	0.07	0.08	0.1	0.0355903	3.42	3.75	3.51	3.56	0.139284	0.65	0.57	0.61	0.61	0.0326599	0.74	0.66	0.7	0.7
CBZL	7.65	6.68	7.09	7.14	0.397576	141.7	124.87	131.92	132.83	6.90088	9.21	5.99	7.57	7.59	1.31464	128.28	101.63	112.48	114.13	10.9422	1704.98	1885.39	1798.02	1796.13	73.6642	279.79	358.16	358.16	332.037	36.944	0.16	0.07	0.1	0.11	0.0374166	5.32	5	4.98	5.1	0.155778	0.91	0.8	0.84	0.85	0.0454606	1.02	1.13	1.06	1.07
BLL	5.57	6.67	6.15	6.13	0.449296	146.27	129.53	136.58	137.46	6.86235	7.67	4.48	5.94	6.03	1.30387	150.24	177.75	165.63	164.54	11.2573	1914.52	2094.39	1993.73	2000.88	73.6055	120.11	187.25	171.65	159.67	28.689	0.13	0.07	0.07	0.09	0.0282843	4.23	4.51	4.31	4.35	0.117757	1.05	0.96	0.99	1	0.0374166	1.12	1.03	1.06	1.07
LDL	6.52	5.34	5.87	5.91	0.482563	185.04	168.46	177.11	176.87	6.77088	8.55	5.59	6.47	6.87	1.24107	165.24	137.41	150.62	151.09	11.3664	1444.41	1258.25	1348.39	1350.35	76.0121	335.68	256.3	295.87	295.95	32.4068	0.12	0.06	0.09	0.09	0.0244949	4.55	4.85	4.64	4.68	0.125698	0.73	0.94	0.97	0.88	0.106771	0.97	0.87	0.92	0.92
HMXSX	5.47	6.54	5.99	6	0.436883	156.27	164.38	130.43	150.36	14.4763	6.38	9.64	7.95	7.99	1.33119	197.86	225.99	212.27	212.04	11.4852	1385.66	1567.76	1473.44	1475.62	74.358	180.5	110.06	144.74	145.1	28.7581	0.05	0.12	0.1	0.09	0.0294392	5.17	5.56	5.32	5.35	0.160624	1.37	1.27	1.32	1.32	0.0408248	1.3	1.39	1.33	1.34
SLGZL	4.71	5.74	5.51	5.32	0.441437	116.65	98.37	99.05	104.69	8.46155	7.84	4.81	5.98	6.21	1.24764	105.01	77.01	90.62	90.88	11.4324	1302.74	1487.46	1391.53	1393.91	75.4304	66.88	83.26	64.87	71.67	8.23635	0.12	0.06	0.06	0.08	0.0282843	4.28	4	4.02	4.1	0.127541	0.7	0.61	0.67	0.66	0.0374166	0.97	0.89	1	0.953333
JBL	7.56	6.4	6.77	6.91	0.483804	115.11	97.91	105.46	106.16	7.03929	8.16	5.01	6.66	6.61	1.28647	141.09	167.3	152.77	153.72	10.7213	2178.49	1995.33	2073.32	2082.38	75.0487	136.85	97.99	125.01	119.95	16.263	0.13	0.06	0.14	0.11	0.0355903	3.89	4.18	4.06	4.04333	0.118977	1	0.91	0.97	0.96	0.0374166	1.72	1.64	1.68	1.68
XHTL	4.51	5.62	5.11	5.08	0.453652	112.25	129.36	120.55	120.72	6.98616	4.03	7.3	5.65	5.66	1.33499	116.84	143.78	129.08	129.9	11.0135	1781.79	1966.21	1873.85	1873.95	75.2892	115.21	90.35	95.1	100.22	10.7755	0.12	0.05	0.07	0.08	0.0294392	3.41	3.67	3.6	3.56	0.109848	0.91	0.8	0.84	0.85	0.0454606	0.95	0.86	0.92	0.91
DXSL	5.09	6.18	5.68	5.65	0.445496	174.11	157.79	166.01	165.97	6.66267	5.33	8.44	6.75	6.84	1.27125	104.66	132.54	118.39	118.53	11.3824	1455.14	1456.96	1732.83	1548.31	130.477	130.05	220.56	213.54	188.05	41.1122	0.12	0.06	0.06	0.08	0.0282843	4.51	4.8	4.73	4.68	0.123558	1.07	0.97	1.02	1.02	0.0408248	0.8	0.78	0.91	0.83
YHL	7.57	6.49	7.09	7.05	0.441814	125.82	142.85	134.05	134.24	6.95377	7.78	4.6	5.92	6.1	1.30445	77.05	104.03	90.72	90.6	11.0149	886.28	1068.36	970.99	975.21	74.3937	341.26	270.85	300.1	304.07	28.8815	0.13	0.08	0.12	0.11	0.0216025	4.11	4.38	4.29	4.26	0.11225	0.43	0.34	0.37	0.38	0.0374166	0.8	0.9	0.82	0.84
FXL	5.35	6.59	6	5.98	0.506425	121.02	137.48	127.24	128.58	6.78624	7.8	4.52	6.01	6.11	1.34092	128.11	156.62	142.35	142.36	11.6392	1180.58	1368.53	1277.24	1275.45	76.7407	140.55	172.36	142.78	151.897	14.4984	0.13	0.07	0.07	0.09	0.0282843	5.17	4.9	5.08	5.05	0.11225	1.36	1.46	1.41	1.41	0.0408248	1.38	1.47	1.41	1.42
QXSL	6.07	7	6.7	6.59	0.387556	134.9	151.95	142.87	143.24	6.96555	7.94	11.02	9.66	9.54	1.26026	201.31	173.88	189.17	188.12	11.2228	1540.22	1362.34	1457.46	1453.34	72.6776	128.56	215.51	179.19	174.42	35.6571	0.14	0.07	0.12	0.11	0.0294392	5.89	6.05	5.85	5.93	0.0864099	1.08	1.17	1.11	1.12	0.0374166	1.37	1.3	1.32	1.33
QPHL	8.46	7.65	8.13	8.08	0.332566	157.12	174.47	166.59	166.06	7.09302	6.31	9.58	7.84	7.91	1.33589	152.46	125.34	138.51	138.77	11.0732	1811.24	1994.95	1901.58	1902.59	75.0027	238.55	311.25	258.37	269.39	30.6855	0.17	0.1	0.15	0.14	0.0294392	6.5	6.78	6.7	6.66	0.117757	1.12	1.21	1.18	1.17	0.0374166	1.13	1.03	1.08	1.08
QHL	7.12	6.13	6.55	6.6	0.405709	117.83	133.7	123.71	125.08	6.55092	9.27	6.09	7.44	7.6	1.30315	130.21	155.83	142.12	142.72	10.4679	1488.94	1301.51	1396.86	1395.77	76.5219	410	328.75	353.13	363.96	34.0427	0.15	0.08	0.1	0.11	0.0294392	4.8	5.08	4.94	4.94	0.11431	0.88	0.78	0.83	0.83	0.0408248	1.15	1.05	1.1	1.1
YBDJBL	6.91	5.95	6.34	6.4	0.394208	152.88	170.87	163.84	162.53	7.40257	9.37	6.14	7.71	7.74	1.31881	191.4	219.21	205.96	205.523	11.3576	2306.93	2126.42	2222.36	2218.57	73.7416	135.9	201.35	144.28	160.51	29.0802	0.13	0.07	0.1	0.1	0.0244949	4.91	4.62	4.75	4.76	0.118603	1.52	1.43	1.49	1.48	0.0374166	1.47	1.39	1.43	1.43
HLJHGL	6.54	5.47	5.99	6	0.436883	148.38	132.25	141.02	140.55	6.59343	11.11	13.17	13.94	12.74	1.19468	141.29	168.89	155.84	155.34	11.2732	1826.26	1647.72	1734.17	1736.05	72.9008	311.25	396.1	346.94	351.43	34.7851	0.14	0.08	0.08	0.1	0.0282843	4.28	4.59	4.36	4.41	0.131403	0.99	0.9	0.93	0.94	0.0374166	1.4	1.5	1.48	1.46
TL	5.25	6.3	5.82	5.79	0.429185	94.08	77.37	83.19	84.88	6.92571	7.6	4.32	6.05	5.99	1.33973	63.26	89.06	75.89	76.07	10.5336	1830.64	1645.84	1732.69	1736.39	75.4896	254.43	176.38	189.71	206.84	34.0884	0.06	0.12	0.09	0.09	0.0244949	3.1	3.36	3.26	3.24	0.107083	0.74	0.65	0.71	0.7	0.0374166	0.7	0.62	0.69	0.67
HPXL	10.53	9.4	9.92	9.95	0.461808	107.42	123.84	115.72	115.66	6.70357	7.19	10.29	8.59	8.69	1.26754	173.81	201.35	186.95	187.37	11.2471	1977.61	2165.89	2071.84	2071.78	76.865	74.21	81.43	93.78	83.14	8.0804	0.16	0.1	0.16	0.14	0.0282843	6.78	6.53	6.64	6.65	0.102307	0.61	0.69	0.65	0.65	0.0326599	1.27	1.2	1.22	1.23
BLXL	5.33	6.41	5.81	5.85	0.441814	145.21	161.42	153.45	153.36	6.61801	6.94	3.64	5.41	5.33	1.34841	153.9	125.87	139.87	139.88	11.4432	2033	2031.44	2311.31	2125.25	131.566	120.31	152.45	153.03	141.93	15.2895	0.12	0.06	0.09	0.09	0.0244949	7.13	6.86	6.98	6.99	0.110454	1.06	1	1.03	1.03	0.0244949	0.88	0.97	0.91	0.92
MTHL	6.78	5.7	6.33	6.27	0.442945	141.71	158.31	149.83	149.95	6.77745	5.81	8.94	7.51	7.42	1.2794	181.35	213.36	191.97	195.56	13.3123	1925.63	2112.33	2021.38	2019.78	76.2284	70.09	65.33	56.73	64.05	5.52879	0.15	0.06	0.12	0.11	0.0374166	15.71	15.96	15.82	15.83	0.102307	1.09	1	1.06	1.05	0.0374166	1.14	1.06	1.1	1.1
AL	7.23	6.02	6.52	6.59	0.496454	180.55	162.7	170.35	171.2	7.31198	7.83	4.63	6.23	6.23	1.30639	135.67	162.42	146.57	148.22	10.9828	1828.23	2009.45	1912.96	1916.88	74.0347	195.78	113.68	164.09	157.85	33.8064	0.15	0.08	0.13	0.12	0.0294392	9.15	8.94	8.97	9.02	0.0927362	0.85	0.92	0.87	0.88	0.0294392	0.73	0.84	0.77	0.78
HTL	6.91	5.67	6.44	6.34	0.511143	146.61	130.66	135.98	137.75	6.63075	8.53	5.24	6.78	6.85	1.34405	131.24	158.9	145.91	145.35	11.2991	1942.98	1783.87	1865.15	1864	64.9615	253.21	172.57	209.86	211.88	32.9521	0.13	0.08	0.09	0.1	0.0216025	8.3	8.56	8.46	8.44	0.107083	0.72	0.83	0.76	0.77	0.0454606	1.13	1.2	1.18	1.17
TXDYXL	6.47	5.48	5.87	5.94	0.407185	107.75	92.14	97.83	99.24	6.45028	10.26	7.08	8.58	8.64	1.29892	113.21	141.83	127.4	127.48	11.6842	1658.29	1479.53	1565.4	1567.74	72.9972	143.26	225.55	192.4	187.07	33.8055	0.08	0.15	0.07	0.1	0.0355903	10.39	10.66	10.48	10.51	0.11225	0.78	0.7	0.74	0.74	0.0326599	1.1	1.18	1.14	1.14
SL	7.43	8.26	7.86	7.85	0.33892	117.73	101.82	107.75	109.1	6.565	10.07	13.04	11.84	11.65	1.21992	100.11	127.67	113.59	113.79	11.2522	1610.07	1426.38	1515.84	1517.43	74.9996	355.23	256.71	311.34	307.76	40.3002	0.06	0.13	0.17	0.12	0.0454606	12.15	11.97	11.94	12.02	0.0927362	0.75	0.66	0.69	0.7	0.0374166	0.86	0.78	0.82	0.82
DWBKSL	5.61	4.65	5.1	5.12	0.392173	118.94	102.5	110.09	110.51	6.71817	9.16	12.06	11.09	10.77	1.20535	104.16	131.58	119.07	118.27	11.2085	1460.87	1640.7	1557.46	1553.01	73.4827	123.45	206.87	151.78	160.7	34.6352	0.12	0.06	0.06	0.08	0.0282843	4.17	3.9	3.96	4.01	0.115758	0.76	0.66	0.71	0.71	0.0408248	0.82	0.91	0.88	0.87
DNGL	8.51	9.74	9.17	9.14	0.502593	229.21	207.34	218.35	218.3	8.92846	4.08	8.17	6.14	6.13	1.66975	169.55	206.06	187.79	187.8	14.9051	882.85	1117.15	1000	1000	95.6526	367.07	471.21	419.02	419.1	42.515	0.269	0.39	0.322	0.327	0.0495244	7.99	8.43	8.18	8.2	0.180185	1.22	1.15	1.14	1.17	0.0355903	1.21	1.12	1.15	1.16
FX	12.53	13.75	13.11	13.13	0.498264	241.71	219.78	230.61	230.7	8.95311	9.72	13.81	11.69	11.74	1.67011	251.47	287.95	269.68	269.7	14.8929	2192.85	2427.16	2309.99	2310	95.6567	339.14	443.24	391.22	391.2	42.4986	0.378	0.497	0.436	0.437	0.0485867	13.04	13.5	13.21	13.25	0.189912	1.12	1	1.03	1.05	0.0509902	1.67	1.59	1.6	1.62
YY351L	9.08	10.31	9.68	9.69	0.502195	209.73	188.65	198.02	198.8	8.62353	10.21	14.28	12.23	12.24	1.66159	153.47	190.05	171.88	171.8	14.9338	1030.78	1265.31	1147.91	1148	95.7465	586.44	690.61	638.41	638.487	42.5273	0.353	0.472	0.408	0.411	0.0486278	13.7	13.96	13.98	13.88	0.127541	1.6	1.51	1.57	1.56	0.0374166	1.29	1.38	1.35	1.34
QYL	50.85	52.11	51.42	51.46	0.51517	274.02	295.94	285.04	285	8.94885	12.96	17.01	14.94	14.97	1.65354	242.75	279.23	261.02	261	14.8929	2133.96	2368	2251.04	2251	95.5464	250.91	352.51	300.48	301.3	41.4821	0.303	0.427	0.362	0.364	0.0506425	11.58	12.09	11.76	11.81	0.211187	2.77	2.66	2.76	2.73	0.0496655	1.61	1.75	1.65	1.67
JXL	10.14	11.33	10.69	10.72	0.486278	227.52	249.5	238.48	238.5	8.97331	16.27	20.39	18.27	18.31	1.68222	284.06	247.55	265.79	265.8	14.9051	2049.82	2284.2	2166.98	2167	95.6852	86.59	189.12	137.69	137.8	41.8578	0.531	0.412	0.464	0.469	0.04871	18.29	18.73	18.45	18.49	0.181842	2.75	2.83	2.76	2.78	0.0355903	1.77	1.65	1.68	1.7
HJQL	43.63	44.87	44.19	44.23	0.507017	248.61	270.48	259.41	259.5	8.92862	4.72	8.81	6.75	6.76	1.66975	342.75	379.21	361.04	361	14.8848	2981.85	3216.12	3099.03	3099	95.6403	242.02	142.35	191.63	192	40.6909	0.397	0.52	0.448	0.455	0.0504579	10.01	10.44	10.18	10.21	0.176824	1.75	1.82	1.8	1.79	0.0294392	2	2.13	2.05	2.06
LXL	8.15	9.41	8.78	8.78	0.514393	229.22	251.31	240.07	240.2	9.01867	14.39	18.46	16.44	16.43	1.66159	220.27	256.75	238.48	238.5	14.8929	1691.84	1926.17	1808.99	1809	95.6648	422.38	318.2	370.32	370.3	42.5313	0.361	0.48	0.419	0.42	0.0485867	13.89	14.35	14.06	14.1	0.189912	1.21	1.83	2.06	1.7	0.35898	1.78	1.65	1.73	1.72
DXS	5.17	4.15	4.69	4.67	0.416653	124.86	108.85	116.51	116.74	6.53808	4.55	7.65	5.98	6.06	1.26683	188.28	163.95	175.86	176.03	9.93341	1675.74	1489.53	1576.32	1580.53	76.0782	87.73	170.53	130.18	129.48	33.8066	0.1	0.06	0.05	0.07	0.0216025	6.01	5.68	5.89	5.86	0.136382	1.28	1.2	1.21	1.23	0.0355903	1.12	1.21	1.18	1.17
YY1L	5.66	4.55	5.09	5.1	0.453211	123.26	108.25	124.29	118.6	7.33063	6.99	9.82	9.11	8.64	1.20219	142.58	116.35	132.57	130.5	10.8079	793.09	973.06	892.54	886.23	73.6078	87.86	101.29	94.65	94.6	5.48289	0.12	0.05	0.07	0.08	0.0294392	16.78	17.34	17.48	17.2	0.302435	1.12	1.02	1.1	1.08	0.0432049	1.06	0.98	0.99	1.01
CXL	6.52	7.6	7.12	7.08	0.441814	110.42	92.46	101.35	101.41	7.33226	5.11	8.37	6.68	6.72	1.33119	168.91	198.86	181.41	183.06	12.2826	1494.46	1658.6	1552.5	1568.52	67.9606	81.46	100.93	97.3	93.23	8.45356	0.13	0.06	0.08	0.09	0.0294392	6.26	6.55	6.39	6.4	0.118603	1.66	1.58	1.59	1.61	0.0355903	1.59	1.51	1.55	1.55
WX	6.23	7.35	6.73	6.77	0.458112	140.25	155.68	151.01	148.98	6.46075	7.14	9.75	9.48	8.79	1.17192	142.15	170.33	154.98	155.82	11.5198	1502.62	1321.16	1403.34	1409.04	74.1903	240.45	317.89	279.98	279.44	31.6171	0.17	0.07	0.09	0.11	0.0432049	7.3	7.03	7.21	7.18	0.11225	1.08	0.98	1.03	1.03	0.0408248	1.33	1.26	1.28	1.29
NGL	6.23	7.3	6.66	6.73	0.439621	212.35	194.74	202.54	203.21	7.20485	9.4	6.21	7.79	7.8	1.30233	109.87	138.1	123.58	123.85	11.5264	1193.9	1381.78	1286.73	1287.47	76.7035	416.88	496.21	446.09	453.06	32.7592	0.13	0.08	0.12	0.11	0.0216025	5.58	5.85	5.7	5.71	0.110454	1	0.91	0.97	0.96	0.0374166	1.66	1.57	1.6	1.61
XXSL	6.35	5.48	6.08	5.97	0.363593	117.88	134.21	123.18	125.09	6.80212	7.64	10.92	9.4	9.32	1.34025	131.39	159.11	144.32	144.94	11.3251	1847.61	2033.22	1938.18	1939.67	75.7823	250.33	185.65	213.73	216.57	26.4818	0.16	0.08	0.06	0.1	0.0432049	5.18	4.88	4.97	5.01	0.125698	0.9	0.99	0.93	0.94	0.0374166	1.65	1.55	1.57	1.59
DN5L	5.15	6.2	5.66	5.67	0.428719	142.38	158.61	149.76	150.25	6.63492	4.91	8.15	6.41	6.49	1.32393	136.88	109.48	122.73	123.03	11.188	975.57	811.76	908.83	898.72	67.2562	128.3	208.12	158.64	165.02	32.8972	0.12	0.07	0.08	0.09	0.0216025	4.11	3.85	3.95	3.97	0.107083	1.1	1.01	1.07	1.06	0.0374166	1.07	0.99	1.03	1.03
ZXSL	7.21	8.3	7.68	7.73	0.446393	124.43	140.07	130.87	131.79	6.41806	5.71	8.92	7.27	7.3	1.31065	129.45	156.37	141.14	142.32	11.0217	1844.67	2007.88	1905.53	1919.36	67.344	377.32	283.15	310.3	323.59	39.5766	0.15	0.07	0.14	0.12	0.0355903	4.5	4.83	4.65	4.66	0.134907	0.86	0.95	0.89	0.9	0.0374166	1.16	1.07	1.1	1.11
JXSL	4.78	5.84	5.37	5.33	0.433667	119.44	135.26	127.62	127.44	6.45974	7.48	10.7	8.88	9.02	1.31828	130.93	156.55	143.05	143.51	10.4644	1518.27	1703.04	1607.25	1609.52	75.4491	265.23	352.45	307.1	308.26	35.6169	0.12	0.07	0.08	0.09	0.0216025	4.7	4.99	4.83	4.84	0.118603	1.09	1	1.03	1.04	0.0374166	0.84	0.93	0.87	0.88
DML	5.68	4.87	4.84	5.13	0.389102	168.86	152.55	160.24	160.55	6.66214	7.25	10.39	8.61	8.75	1.28572	155.67	128.97	141.66	142.1	10.9047	1403.04	1582.91	1488.13	1491.36	73.4671	121.5	191.87	162.58	158.65	28.8625	0.13	0.06	0.08	0.09	0.0294392	5.78	5.5	5.7	5.66	0.117757	0.92	1	0.96	0.96	0.0326599	1.55	1.46	1.49	1.5
TXL	5.1	6.15	5.55	5.6	0.430116	97.28	112.7	103.22	104.4	6.35024	5.78	9.06	7.3	7.38	1.34025	100.77	127.51	114.53	114.27	10.9181	1161.22	975.72	1073	1069.98	75.7602	237.67	168.35	195.54	200.52	28.518	0.12	0.07	0.08	0.09	0.0216025	5.46	5.2	5.27	5.31	0.109848	0.75	0.85	0.8	0.8	0.0408248	1.55	1.45	1.47	1.49
JTL	5.97	6.98	6.34	6.43	0.417213	180.23	196.4	186.83	187.82	6.63839	5.75	8.86	7.17	7.26	1.27125	261.37	289.95	275.54	275.62	11.6679	1865.81	1679.15	1774.82	1773.26	76.2116	238.25	167.89	209.25	205.13	28.8717	0.12	0.08	0.1	0.1	0.0163299	5.3	5.58	5.38	5.42	0.117757	2.55	2.46	2.49	2.5	0.0374166	1.85	1.73	1.79	1.79
SSDL	8.38	9.64	8.92	8.98	0.51614	240.79	262.55	251.76	251.7	8.88358	7.79	11.84	9.77	9.8	1.65354	269.68	306.15	287.87	287.9	14.8888	3091.85	3326.16	3208.99	3209	95.6567	209.68	313.58	261.84	261.7	42.4171	0.303	0.424	0.362	0.363	0.0494031	12.1	12.44	12.36	12.3	0.145144	1.9	1.85	2.07	1.94	0.094163	2.05	1.96	1.99	2
SSHMSL	17.96	16.7	17.27	17.31	0.51517	95.97	117.78	112.95	108.9	9.35311	11.97	7.87	9.95	9.93	1.67388	263.75	300.26	281.99	282	14.9051	3242.21	3242.17	2890.62	3125	165.732	50.62	133.81	93.37	92.6	33.9665	0.319	0.439	0.37	0.376	0.0491732	11.85	12.31	12.02	12.06	0.189912	2.65	2.57	2.58	2.6	0.0355903	1.96	1.85	1.89	1.9
SSTESL	9.01	10.24	9.55	9.6	0.503389	152.49	174.25	163.46	163.4	8.88358	10.03	5.93	7.95	7.97	1.67388	179.65	216.15	197.9	197.9	14.9011	1774.83	2009.11	1892.06	1892	95.6444	104.59	205.03	154.78	154.8	41.0045	0.357	0.48	0.414	0.417	0.0502593	9.13	9.6	9.29	9.34	0.195107	1.2	1.34	1.33	1.29	0.0637704	1.71	1.8	1.77	1.76
SSKWSL	8.6	7.37	7.97	7.98	0.502195	187.59	209.46	198.45	198.5	8.92846	11.36	7.24	9.24	9.28	1.68222	235.15	271.66	253.39	253.4	14.9051	2729.99	2964.03	2846.98	2847	95.5464	84.35	185.61	133.84	134.6	41.3427	0.293	0.412	0.354	0.353	0.0485867	13.84	14.17	14.14	14.05	0.148997	2.08	1.98	2	2.02	0.0432049	1.77	1.68	1.71	1.72
DNSL	12.26	11.03	11.66	11.65	0.502195	237.62	259.71	248.47	248.6	9.01867	5.55	9.65	7.57	7.59	1.67388	221.45	258	239.65	239.7	14.9215	2070	1835	1954	1953	95.941	103.25	208.44	155.11	155.6	42.945	0.381	0.497	0.433	0.437	0.0474412	10.09	10.57	10.24	10.3	0.200499	1.85	1.75	1.74	1.78	0.0496655	2.8	2.91	2.87	2.86
HLSL	12.75	11.52	12.03	12.1	0.504579	171.91	193.65	182.84	182.8	8.87536	11.86	7.74	9.83	9.81	1.68204	216.73	253.25	235.02	235	14.9092	2481.97	2716.05	2598.98	2599	95.5628	129.97	232.31	181.02	181.1	41.7802	0.377	0.495	0.433	0.435	0.0481941	11.96	12.4	12.15	12.17	0.180185	1.75	1.63	1.72	1.7	0.0509902	1.77	1.68	1.71	1.72
SWSL	14.3	13.03	13.59	13.64	0.519679	239.43	261.39	250.38	250.4	8.96514	8.13	12.24	10.14	10.17	1.67803	201.16	237.65	219.35	219.387	14.897	2938.1	2703.92	2820.98	2821	95.6036	219.51	115.61	167.38	167.5	42.4171	0.4	0.519	0.455	0.458	0.0486278	15.49	15.93	15.62	15.68	0.184572	2.1	2.19	2.13	2.14	0.0374166	2.64	2.83	2.6	2.69
ZLTSL1	11.02	9.82	10.32	10.3867	0.492161	191.61	213.5	202.39	202.5	8.93689	28.57	32.66	30.63	30.62	1.66975	250.19	286.65	268.36	268.4	14.8848	2711.16	2476.98	2593.86	2594	95.6036	232.82	335.75	285.53	284.7	42.0251	0.358	0.484	0.415	0.419	0.051517	18.67	19.11	19.19	18.99	0.228619	2.65	2.71	2.71	2.69	0.0282843	2.58	2.48	2.47	2.51
ZLTSL2	11.75	12.96	12.31	12.34	0.494436	123.14	145.02	133.84	134	8.93319	24.92	29.03	26.93	26.96	1.67803	268.27	304.77	286.46	286.5	14.9011	1894.92	2129.26	2011.82	2012	95.669	73.6	170.3	113.7	119.2	39.6687	0.344	0.471	0.4	0.405	0.0519679	16.94	17.38	17.04	17.12	0.188326	1.45	1.53	1.49	1.49	0.0326599	2.58	2.44	2.57	2.53
ZLTSL3	19.1	20.27	19.7	19.69	0.477703	161.94	183.75	173.01	172.9	8.90423	26.25	30.32	28.27	28.28	1.66159	331.85	368.31	350.14	350.1	14.8848	3125.07	2890.91	3008.02	3008	95.5954	266.65	369.91	318.94	318.5	42.1569	0.305	0.425	0.368	0.366	0.0490102	12.1	12.91	13.36	12.79	0.521344	1.95	1.89	1.89	1.91	0.0282843	3.4	3.3	3.32	3.34
HEBSL1	9.95	11.15	10.52	10.54	0.490102	243.95	265.89	254.86	254.9	8.95701	45.31	49.4	47.34	47.35	1.66975	224.87	261.37	243.06	243.1	14.9011	2320.75	2555.11	2438.14	2438	95.6771	181.03	80.52	130.85	130.8	41.0331	0.165	0.275	0.205	0.215	0.0454606	27.62	28.07	27.8	27.83	0.184932	1.57	1.49	1.5	1.52	0.0355903	4.32	4.45	4.4	4.39
HEBSL2	14.57	15.78	15.1	15.15	0.495244	156.29	178.23	167.08	167.2	8.95737	10.34	14.43	12.37	12.38	1.66975	211.05	247.51	229.34	229.3	14.8848	1897.87	2132.32	2014.81	2015	95.7139	100.67	199.65	151.78	150.7	40.4156	0.347	0.475	0.402	0.408	0.0524277	13.11	13.64	13.33	13.36	0.217409	1.29	1.21	1.25	1.25	0.0326599	2.1	2.21	2.11	2.14
average	9.29329	9.50814	9.38214	9.39452	0.0881509	166.126	170.399	167.587	168.038	1.77324	9.59143	10.9071	10.2771	10.2586	0.537299	177.141	198.135	188.354	187.876	8.57723	1792.75	1865.99	1830.93	1829.89	29.9092	215	248.117	233.324	232.147	13.5455	0.211371	0.226614	0.2128	0.216929	0.00687362	9.02429	9.54529	9.28214	9.2839	0.212701	1.28957	1.26729	1.29043	1.28243	0.0107133	1.45771	1.43843	1.44286	1.44633
maximum	50.85	52.11	51.42	51.46	0.51517	274.02	295.94	285.04	285	8.94885	45.31	49.4	47.34	47.35	1.66975	370.19	406.68	388.33	388.4	14.8971	3242.21	3326.16	3208.99	3259.12	49.3063	885.41	781.53	833.26	833.4	42.4089	0.531	0.52	0.464	0.505	0.0293371	27.62	28.07	27.8	27.83	0.184932	2.77	2.83	2.76	2.78667	0.0309121	4.32	4.45	4.4	4.39
minimum	4.51	4.15	4.69	4.45	0.224499	79.79	64.15	72.66	72.2	6.39328	3.58	3.64	5.41	4.21	0.848882	60.21	77.01	71.84	69.6867	7.02555	793.09	811.76	871.94	825.597	33.6444	50.62	63.61	56.73	56.9867	5.30625	0.05	0.05	0.05	0.05	0	3.1	3.36	3.26	3.24	0.107083	0.43	0.34	0.37	0.38	0.0374166	0.7	0.62	0.69	0.67
range	46.34	47.96	46.73	47.01	0.690362	194.23	231.79	212.38	212.8	15.3367	41.73	45.76	41.93	43.14	1.85442	309.98	329.67	316.49	318.713	8.1907	2449.12	2514.4	2337.05	2433.52	73.238	834.79	717.92	776.53	776.413	47.712	0.481	0.47	0.414	0.455	0.0293371	24.52	24.71	24.54	24.59	0.0852447	2.34	2.49	2.39	2.40667	0.062361	3.62	3.83	3.71	3.72
SD	7.17921	7.37283	7.24432	7.26545	0.0804431	50.4743	56.0564	52.883	53.1379	2.28599	6.39049	7.28191	6.66527	6.77922	0.372734	62.8336	70.4724	66.3012	66.5357	3.12292	555.533	570.735	545.176	557.148	10.4967	136.137	136.029	132.621	134.929	1.63261	0.110976	0.180549	0.14472	0.145415	0.0284074	4.87949	5.15087	5.02735	5.01924	0.110938	0.538335	0.544872	0.551044	0.54475	0.00518944	0.632185	0.643838	0.629662	0.635228
CV	0.772516	0.775422	0.772139	0.773359	0.00146698	0.303831	0.328971	0.315556	0.316119	0.0102711	0.66627	0.667627	0.648553	0.660817	0.00868962	0.354709	0.355679	0.352004	0.354131	0.00155541	0.309877	0.305862	0.297759	0.304499	0.0050402	0.633196	0.548246	0.568399	0.58328	0.0362419	0.525029	0.796725	0.680074	0.667276	0.111288	0.540707	0.539624	0.541615	0.540649	0.000813781	0.417452	0.429952	0.427024	0.42481	0.00533787	0.433682	0.447598	0.4364	0.439227
Variety (pulp)	Na					Mg					Al					P					K					Ca					Cr					Fe					Cu					Zn
SPL	3.96	3.56	3.64	3.72	0.17282	68.8	68.6	69.6	69	0.432049	2.11	2.68	2.32	2.37	0.235372	124.3	146.1	135.5	135.3	8.90094	1767	1865	1822	1818	40.1082	32.3	48.1	39.6	40	6.45652	0.143	0.077	0.116	0.112	0.0270924	2.87	2.36	2.39	2.54	0.233666	0.17	0.56	0.47	0.4	0.166733	0.38	0.34	0.63	0.45
DXL	3.53	3.33	2.95	3.27	0.240555	54.8	55.6	55.5	55.3	0.355903	1.67	1.2	1.45	1.44	0.192007	81.4	101.9	93.3	92.2	8.40516	893	988	948	943	38.9444	28.51	43.21	35.08	35.6	6.0125	0.058	0.02	0.051	0.043	0.0165126	1.89	3.43	3.02	2.78	0.651204	0.21	0.48	0.3	0.33	0.11225	0.29	0.45	0.37	0.37
XPXL	2.16	2.61	3	2.59	0.34322	56	57	56.8	56.6	0.432049	0.91	0.4	0.55	0.62	0.214009	117.93	131.45	137	128.793	8.00873	1280	1428	1462	1390	79.0105	27.32	42.65	35.93	35.3	6.27428	0.051	0.123	0.102	0.092	0.0302324	2.04	1.65	1.8	1.83	0.160624	0.15	0.22	0.17	0.18	0.0294392	0.31	0.52	0.37	0.4
WXL	2.83	3.69	3.32	3.28	0.352231	68.5	69.3	67.1	68.3	0.909212	1.15	1.37	1.26	1.26	0.0898146	76.4	97.37	85.7	86.49	8.57917	1018	1352	1314	1228	149.301	78.4	64.01	70.29	70.9	5.89051	0.139	0.065	0.096	0.1	0.0303425	3.02	3.55	2.82	3.13	0.308004	0.26	0.5	0.35	0.37	0.0989949	0.35	0.53	0.38	0.42
PDXL	5.94	6.66	6.6	6.4	0.32619	69.35	68.71	69.3	69.12	0.290631	4.22	4.49	4.34	4.35	0.110454	131.96	160.25	168.47	153.56	15.6378	1206.12	1287.84	1245.69	1246.55	33.3676	34.05	44.92	38.57	39.18	4.45857	0.12	0.08	0.1	0.1	0.0163299	2.66	4.08	3.4	3.38	0.579885	0.58	0.32	0.45	0.45	0.106145	0.67	0.81	0.71	0.73
PDX1	3.47	4.07	4.25	3.93	0.333467	68.6	69.6	69.7	69.3	0.496655	1.65	2.1	1.86	1.87	0.183848	89.5	91.2	86.6	89.1	1.89912	1382	1136	1298	1272	102.098	36.2	50.63	43.37	43.4	5.89106	0.159	0.095	0.115	0.123	0.0267333	2.87	5.59	4.56	4.34	1.12128	0.12	0.37	0.17	0.22	0.108012	0.31	0.46	0.43	0.4
PDX2	2.66	2.47	3.08	2.73667	0.254864	69.5	69.4	68.6	69.1667	0.402768	2.9	2.72	3	2.87333	0.115854	91.1	109.2	172.4	124.233	34.8513	1023	915	1228	1055.33	129.811	33.1	40.9	42.8	38.9333	4.19709	0.057	0.105	0.095	0.0856667	0.0206774	3.18	4.96	4	4.04667	0.727431	0.5	0.59	0.32	0.47	0.11225	0.64	0.57	0.39	0.533333
HGL	2.59	3.18	3.41	3.06	0.34535	82.1	83	83.3	82.8	0.509902	2.13	1.75	1.61	1.83	0.219697	117.9	138.5	130.9	129.1	8.50568	1585	1794	1769	1716	93.1916	38.2	52.6	46.3	45.7	5.89406	0.054	0.11	0.073	0.079	0.0232522	3.93	4.38	4.08	4.13	0.187083	0.26	0.55	0.42	0.41	0.118603	0.27	0.44	0.28	0.33
HLL	4.12	4.62	5.06	4.6	0.384014	96.1	97.5	97.4	97	0.637704	2.4	1.93	2	2.11	0.207043	139.6	159.8	148.5	149.3	8.26599	1477	1735	1543	1585	109.435	56.7	68.7	61.2	62.2	4.94975	0.157	0.088	0.112	0.119	0.0286007	5.16	7.59	7.41	6.72	1.10553	0.22	0.42	0.47	0.37	0.108012	0.64	0.45	0.47	0.52
ML	2.43	3.04	3.08	2.85	0.297433	95.8	96.9	96.5	96.4	0.454606	1.64	1.18	1.35	1.39	0.189912	139.2	159.5	150.7	149.8	8.31184	1753	1982	1923	1886	97.0807	39.27	53.05	47.18	46.5	5.64617	0.022	0.076	0.031	0.043	0.023622	8.45	6.25	7.02	7.24	0.911519	0.55	0.89	0.72	0.72	0.138804	0.49	0.69	0.53	0.57
QPCL	2.42	3.01	3.33	2.92	0.376917	46.1	47	46.1	46.4	0.424264	2.25	2.7	2.37	2.44	0.190263	74.2	95.3	83.1	84.2	8.64908	585	674.96	618	625.987	37.1577	42.13	55.75	49.72	49.2	5.57249	0.12	0.166	0.113	0.133	0.0235089	3.98	5.1	3.61	4.23	0.633456	0.19	0.35	0.27	0.27	0.0653197	0.25	0.43	0.25	0.31
HXL	2.61	3.21	3.33	3.05	0.31496	40.6	41.6	42	41.4	0.588784	1.39	1.65	1.97	1.67	0.237206	68.1	90.5	77.2	78.6	9.19819	858	959	907	908	41.2391	30.51	16.8	23.19	23.5	5.60137	0.062	0.124	0.066	0.084	0.0283314	8.63	6.15	6.85	7.21	1.04397	0.37	0.61	0.52	0.5	0.0989949	0.27	0.45	0.39	0.37
LHHXSL	2.46	3.04	3.11	2.87	0.291319	98	98.8	98.1	98.3	0.355903	1.46	1.95	1.87	1.76	0.214631	97.6	119	107.7	108.1	8.74109	1457.21	1356.64	1392	1401.95	41.656	66.9	52.8	59.4	59.7	5.76021	0.062	0.111	0.073	0.082	0.0209921	2.55	4.55	3.13	3.41	0.840159	0.28	0.59	0.33	0.4	0.135892	0.22	0.46	0.25	0.31
HHGL	5.68	5.13	5.48	5.43	0.227303	83.5	82.68	83.54	83.24	0.396316	5.75	5.6	5.51	5.62	0.0989949	141.62	109	129.48	126.7	13.4614	2654.57	2574.11	2614.16	2614.28	32.8478	88.8	100.79	94.54	94.71	4.89637	0.06	0.14	0.07	0.09	0.0355903	4.88	3.32	3.38	3.86	0.721665	0.79	0.64	0.88	0.77	0.0989949	0.87	1.05	0.93	0.95
XCZL	5.65	5.16	5.18	5.33	0.226421	47.29	48.02	47.16	47.49	0.378506	3.95	3.81	3.85	3.87	0.0588784	74.29	95.31	72.89	80.83	10.2548	1383.61	1302.97	1343.32	1343.3	32.9211	51.64	41.4	46.19	46.41	4.18336	0.15	0.07	0.05	0.09	0.0432049	3.73	2.11	1.99	2.61	0.793473	0.3	0.56	0.4	0.42	0.107083	0.62	0.47	0.59	0.56
CBZL	7.05	6.72	6.9	6.89	0.134907	87.04	86.44	86.86	86.78	0.251396	5.35	5.08	5.32	5.25	0.12083	113.73	153.5	126.22	131.15	16.6061	2073.35	2153.85	2113.99	2113.73	32.8645	96.09	106.52	101.02	101.21	4.26015	0.18	0.1	0.08	0.12	0.0432049	2.95	3.98	3.36	3.43	0.423399	0.4	0.65	0.57	0.54	0.104243	0.81	1.05	0.87	0.91
BLL	5.97	5.64	5.94	5.85	0.148997	90.13	89.29	89.5	89.64	0.356931	5.1	5.37	5.19	5.22	0.11225	137.5	109.5	132.95	126.65	12.2683	1858.73	1939.99	1899	1899.24	33.1747	61.17	72.87	66.9	66.98	4.77684	0.16	0.08	0.06	0.1	0.0432049	3.21	4.85	3.19	3.75	0.77786	0.86	0.58	0.78	0.74	0.117757	0.9	0.98	1	0.96
LDL	10.85	10.18	10.17	10.4	0.318224	133.54	107.13	81.32	107.33	21.3192	6.68	6.93	6.82	6.81	0.102307	164.84	132.4	128.61	141.95	16.2595	1608.05	1688.65	1648.68	1648.46	32.9052	93.44	83.22	88.48	88.38	4.1729	0.21	0.15	0.15	0.17	0.0282843	5.33	3.56	3.8	4.23	0.783964	0.3	0.6	0.54	0.48	0.129615	0.84	0.62	0.73	0.73
HMXSX	6.98	6.51	6.67	6.72	0.195107	69.06	69.79	69.26	69.37	0.308004	6.49	6.22	6.37	6.36	0.110454	98.54	128.9	123.59	117.01	13.239	1373.84	1456.19	1415.06	1415.03	33.6193	51.89	40.88	45.17	45.98	4.53116	0.08	0.15	0.1	0.11	0.0294392	3.64	2.32	2.71	2.89	0.553715	0.59	0.85	0.75	0.73	0.107083	0.7	0.87	0.74	0.77
SLGZL	4.41	4	4.13	4.18	0.171075	59.9	59.03	59.21	59.38	0.374967	3.13	2.89	3.01	3.01	0.0979796	91.21	60	83.6	78.27	13.2872	1261.46	1178.43	1218.49	1219.46	33.9038	23.84	34.06	28.89	28.93	4.17239	0.05	0.12	0.07	0.08	0.0294392	1.73	2.98	2.67	2.46	0.531476	0.32	0.55	0.3	0.39	0.113431	0.72	0.55	0.53	0.6
JBL	9	9.52	9.11	9.21	0.223756	77.58	76.91	77.47	77.32	0.293371	5.63	5.36	5.51	5.5	0.110454	252.02	217	242.19	237.07	14.7481	2477.19	2562.27	2521.14	2520.2	34.7401	62.76	73.18	68.57	68.17	4.26334	0.21	0.1	0.2	0.17	0.0496655	5.06	3.84	4.36	4.42	0.499867	1.15	0.95	0.96	1.02	0.0920145	1.49	1.3	1.44	1.41
XHTL	6.45	6.01	6.2	6.22	0.180185	59.58	60.47	59.8	59.95	0.378506	5.05	5.32	5.23	5.2	0.11225	152	183.32	187.34	174.22	15.7974	2195.95	2282.04	2241.89	2239.96	35.1726	33.11	44.14	37.71	38.32	4.52359	0.15	0.07	0.11	0.11	0.0326599	2.41	3.53	2.82	2.92	0.462673	0.3	0.5	0.46	0.42	0.0864099	0.5	0.61	0.57	0.56
DXSL	5.02	5.5	5.35	5.29	0.200499	71.82	72.6	71.73	72.05	0.39064	4.3	4.01	4.11	4.14	0.120277	153.83	134.7	154.18	147.57	9.10159	2491.23	2585.43	2538.36	2538.34	38.457	55.16	66.15	59.32	60.21	4.53057	0.17	0.07	0.09	0.11	0.0432049	4.12	2.93	3.36	3.47	0.492003	0.73	0.57	0.65	0.65	0.0653197	0.42	0.58	0.53	0.51
YHL	6.21	5.65	6.02	5.96	0.232522	106.94	107.67	106.96	107.19	0.339509	5.18	4.87	4.98	5.01	0.128323	116.5	91.15	93.7	100.45	11.3967	1500.04	1582.32	1541.09	1541.15	33.5907	122.45	111.41	115.64	116.5	4.5479	0.09	0.15	0.09	0.11	0.0282843	3.66	2.36	2.83	2.95	0.537463	0.21	0.36	0.27	0.28	0.0616441	0.82	0.69	0.71	0.74
FXL	7.28	6.75	7.15	7.06	0.225536	51.88	52.63	51.76	52.09	0.384968	5.89	5.65	5.77	5.77	0.0979796	96.02	121.39	106.35	107.92	10.4166	1100.07	1183.01	1141.09	1141.39	33.8608	30.89	41.9	35.27	36.02	4.52599	0.14	0.06	0.13	0.11	0.0355903	3.86	2.21	2.48	2.85	0.722634	0.5	0.62	0.59	0.57	0.0509902	0.88	0.65	0.72	0.75
QXSL	6.32	6.97	6.69	6.66	0.266208	59.27	58.49	58.61	58.79	0.342929	5.18	4.88	5.06	5.04	0.123288	95.37	66.6	60.75	74.24	15.1308	913.65	994.71	952.74	953.7	33.0996	47.64	58.65	52.14	52.81	4.51971	0.07	0.16	0.1	0.11	0.0374166	4.81	3	3.26	3.69	0.799041	0.38	0.56	0.41	0.45	0.0787401	0.56	0.7	0.63	0.63
QPHL	5.1	5.55	5.31	5.32	0.183848	60.65	61.21	61.02	60.96	0.232522	3.92	4.25	4.22	4.13	0.148997	119.2	90.96	118.52	109.56	13.1551	1508.82	1589.08	1548.89	1548.93	32.766	64.2	75.19	68.69	69.36	4.51159	0.06	0.16	0.05	0.09	0.0496655	4.07	2.37	2.35	2.93	0.806143	0.59	0.46	0.54	0.53	0.0535413	0.74	0.58	0.66	0.66
QHL	6.72	7.33	6.74	6.93	0.282961	103.15	103.69	103.21	103.35	0.241661	5.11	4.82	4.95	4.96	0.118603	179.83	209.12	197.61	195.52	12.0486	1758.14	1838.7	1798.33	1798.39	32.8885	114.89	103.37	109.1	109.12	4.70304	0.22	0.08	0.06	0.12	0.0711805	4.4	2.79	3.04	3.41	0.707437	0.69	0.57	0.63	0.63	0.0489898	0.88	0.7	0.85	0.81
YBDJBL	8.75	8.23	8.64	8.54	0.223756	127.35	127.7	125.8	126.95	0.825631	5.89	5.61	5.81	5.77	0.117757	279.15	242.13	250.38	257.22	15.8684	1999.12	2085.22	2042.05	2042.13	35.1502	73.58	85.02	78.97	79.19	4.67295	0.19	0.09	0.11	0.13	0.0432049	4.74	3.17	3.37	3.76	0.697758	0.79	0.93	0.83	0.85	0.0588784	1.1	1.26	1.18	1.18
HLJHGL	5.35	6.05	6.09	5.83	0.339804	105.52	106.32	105.77	105.87	0.334166	4.35	4.05	4.17	4.19	0.123288	116.5	92.58	107.39	105.49	9.85728	1474.97	1560.6	1513.93	1516.5	35.0055	98	87.27	92.47	92.58	4.38119	0.06	0.15	0.06	0.09	0.0424264	1.91	3.63	2.8	2.78	0.702329	0.45	0.31	0.35	0.37	0.0588784	0.93	0.74	0.88	0.85
TL	7.95	7.17	7.98	7.7	0.374967	63.49	64.23	63.44	63.72	0.361202	6.65	6.37	6.51	6.51	0.11431	63.72	40.59	56.61	53.64	9.6735	1947.36	1852.43	1893.04	1897.61	38.8895	98.67	110.02	105.08	104.59	4.64655	0.1	0.16	0.13	0.13	0.0244949	2.33	3.8	2.69	2.94	0.62562	0.62	0.4	0.48	0.5	0.0909212	0.65	0.53	0.59	0.59
HPXL	7.7	8.16	7.93	7.93	0.187794	60.21	60.97	60.32	60.5	0.335361	5.27	5.02	5.04	5.11	0.113431	118.4	142.88	131.24	130.84	9.99792	1144.27	1228.05	1181.66	1184.66	34.2688	37.62	48.19	42.83	42.88	4.31533	0.22	0.07	0.13	0.14	0.0616441	4.94	3.27	3.43	3.88	0.752374	0.26	0.41	0.29	0.32	0.0648074	0.73	0.57	0.65	0.65
BLXL	6.45	5.97	6.15	6.19	0.19799	87.58	88.26	87.8	87.88	0.283314	4.68	4.95	4.83	4.82	0.110454	138.4	119.75	113.25	123.8	10.6593	2022.95	1932.13	1972.74	1975.94	37.1461	57.04	68.38	62.53	62.65	4.63031	0.15	0.05	0.1	0.1	0.0408248	4.03	2.48	2.64	3.05	0.696036	0.6	0.79	0.74	0.71	0.0804156	0.79	0.67	0.76	0.74
MTHL	5.58	6.12	6	5.9	0.231517	74.81	75.47	74.96	75.08	0.282489	4.88	4.56	4.66	4.7	0.133666	147.81	109.75	118.85	125.47	16.2277	1567.94	1651.48	1609.89	1609.77	34.1052	23.24	34.12	28.83	28.73	4.4423	0.07	0.14	0.09	0.1	0.0294392	5.33	3.85	4.17	4.45	0.63582	0.48	0.62	0.58	0.56	0.0588784	0.6	0.73	0.71	0.68
AL	4.78	4.2	4.73	4.57	0.262425	74.84	74.16	74.14	74.38	0.325372	3.9	3.62	3.73	3.75	0.115181	138.47	103.75	108	116.74	15.4631	1552.74	1635.56	1592.41	1593.57	33.8211	47.29	36.32	40.95	41.52	4.49658	0.06	0.11	0.07	0.08	0.0216025	4.03	2.34	2.45	2.94	0.772054	0.52	0.3	0.47	0.43	0.094163	0.5	0.66	0.55	0.57
HTL	7.11	7.75	7.37	7.41	0.262805	106.57	106.05	106.16	106.26	0.223756	5.28	5.03	5.14	5.15	0.102307	166.82	135.73	148.23	150.26	12.7733	1923.02	1842.13	1882.68	1882.61	33.0232	103.81	92.54	98.19	98.18	4.60096	0.2	0.1	0.06	0.12	0.0588784	3.37	4.32	4.28	3.99	0.43871	0.5	0.65	0.56	0.57	0.0616441	0.88	1	0.94	0.94
TXDYXL	7.54	6.77	6.63	6.98	0.400083	64.88	64.33	64.71	64.64	0.229928	4.5	4.77	4.65	4.64	0.110454	85.26	97.83	87.93	90.34	5.40724	1112.38	1193.84	1154.16	1153.46	33.2596	74.26	84.85	79.3	79.47	4.32502	0.19	0.09	0.08	0.12	0.0496655	5.42	4.47	5.44	5.11	0.452622	0.3	0.52	0.5	0.44	0.0993311	0.5	0.65	0.56	0.57
SL	5.56	5.99	5.79	5.78	0.175689	68.61	67.79	67.87	68.09	0.369143	4.88	4.62	4.75	4.75	0.106145	134.35	139.58	134.37	136.1	2.46075	2011.66	1930.24	1971.85	1971.25	33.2423	93.36	104.39	99.49	99.08	4.5123	0.06	0.15	0.06	0.09	0.0424264	4.19	3.03	3.37	3.53	0.486895	0.51	0.35	0.43	0.43	0.0653197	0.58	0.41	0.48	0.49
DWBKSL	6.2	5.61	6.13	5.98	0.263186	65.55	64.76	65.59	65.3	0.382187	4.18	3.9	4.04	4.04	0.11431	86.35	89.26	86.2	87.27	1.40847	1200.92	1281.52	1241.16	1241.2	32.9048	56.85	67.36	62.27	62.16	4.29139	0.16	0.06	0.08	0.1	0.0432049	3.71	2.5	2.82	3.01	0.511924	0.5	0.3	0.34	0.38	0.0864099	0.55	0.64	0.58	0.59
DNGL	2.36	2.95	2.97	2.76	0.282961	67.3	68.2	68.2	67.9	0.424264	1.21	1.71	1.4	1.44	0.206074	67.1	88.4	76.1	77.2	8.73041	964.21	862	898	908.07	42.3302	66.6	52.75	59.15	59.5	5.65965	0.037	0.077	0.027	0.047	0.0216025	3.88	6.43	4.9	5.07	1.04795	0.2	0.47	0.29	0.32	0.11225	0.3	0.59	0.25	0.38
FX	3.13	3.71	3.78	3.54	0.291319	99	100	98.9	99.3	0.496655	0.57	0.94	0.83	0.78	0.155134	59.5	80.3	68.1	69.3	8.53385	867	965.86	918	916.953	40.3662	58.4	45.1	52.2	51.9	5.43384	0.047	0.097	0.081	0.075	0.0208487	2.28	4.03	1.73	2.68	0.980646	0.06	0.21	0.09	0.12	0.0648074	0.21	0.43	0.17	0.27
YY351L	2.05	2.67	2.63	2.45	0.283314	53.3	54.1	53.4	53.6	0.355903	1.02	1.52	1.15	1.23	0.211818	105.9	127.5	115.8	116.4	8.82836	1118	1222	1182	1174	42.833	55.6	69.1	63.1	62.6	5.52268	0.079	0.13	0.097	0.102	0.0211187	4.55	6.56	5.93	5.68	0.839405	0.29	0.49	0.33	0.37	0.0864099	0.51	0.25	0.26	0.34
QYL	13.71	14.32	14.6	14.21	0.371573	76.8	77.5	80.6	78.3	1.65126	14.96	15.3	15.13	15.13	0.138804	187.17	208.85	196.48	197.5	8.88016	1969.12	1870.04	1914.84	1918	40.5109	44	57.1	52.2	51.1	5.40432	0.102	0.16	0.161	0.141	0.0275802	4.46	6.74	5.57	5.59	0.930914	0.55	0.89	0.81	0.75	0.145144	0.3	0.6	0.57	0.49
JXL	3.22	2.79	1.85	2.62	0.572072	61.6	63.5	61.5	62.2	0.920145	3.74	4.21	4.05	4	0.195107	73	94.52	82.38	83.3	8.80956	933	836	880	883	39.6569	31.8	19.7	25	25.5	4.95244	0.036	0.081	0.066	0.061	0.0187083	2.53	4.58	4.02	3.71	0.86514	0.31	0.56	0.33	0.4	0.113431	0.16	0.57	0.26	0.33
HJQL	5.19	5.84	5.83	5.62	0.304083	57.5	56.1	57.1	56.9	0.588784	1.09	1.37	1.32	1.26	0.121929	117.05	138.6	126.25	127.3	8.82902	1650.2	1549.15	1592	1597.12	41.4118	35.9	22.3	29.1	29.1	5.55218	0.198	0.142	0.14	0.16	0.0268825	3.65	5.75	4.52	4.64	0.86151	0.43	0.71	0.6	0.58	0.115181	0.62	0.3	0.55	0.49
LXL	3.65	3.17	2.84	3.22	0.332566	66.1	65.1	64.4	65.2	0.697615	0.75	1.16	0.88	0.93	0.171075	137.12	159.16	147.72	148	8.99997	1137	1235	1198	1190	40.4063	64.4	52.2	57.7	58.1	4.98865	0.11	0.158	0.104	0.124	0.0241661	3.09	5.73	4.44	4.42	1.07787	0.36	0.68	0.46	0.5	0.133666	0.38	0.59	0.44	0.47
DXS	4.97	4.61	4.7	4.76	0.152971	60.99	60.53	60.82	60.78	0.189912	3.13	3.08	3.12	3.11	0.0216025	160.99	194.71	196.87	184.19	16.4286	1789.77	1708.96	1750.13	1749.62	32.9925	49.32	37.01	42.7	43.01	5.03031	0.1	0.06	0.08	0.08	0.0163299	4.02	3.08	3.61	3.57	0.384794	0.92	0.7	0.81	0.81	0.0898146	0.82	0.69	0.71	0.74
YY1L	7.21	6.8	6.99	7	0.167531	49.11	49.83	49.71	49.55	0.31496	5.15	5.46	5.26	5.29	0.128323	72.1	101.2	117.34	96.88	18.7201	882.15	964.36	923.27	923.26	33.5621	26.36	36.88	32.07	31.77	4.30001	0.16	0.08	0.12	0.12	0.0326599	2.35	3.58	2.77	2.9	0.51049	0.78	0.5	0.58	0.62	0.117757	0.82	0.6	0.68	0.7
CXL	8.15	7.65	8.02	7.94	0.211818	44.58	45.33	45.09	45	0.31273	12.91	12.66	12.77	12.78	0.102307	79.64	93	74.32	82.32	7.85801	752.33	837.73	793.86	794.64	34.8688	56.23	46.03	51.25	51.17	4.16452	0.23	0.12	0.07	0.14	0.0668331	6.82	5.54	5.91	6.09	0.537835	0.46	0.7	0.64	0.6	0.10198	0.75	0.6	0.63	0.66
WX	6.18	6.79	6.77	6.58	0.282961	62.67	63.43	62.78	62.96	0.335361	4.58	4.23	4.39	4.4	0.143062	132.7	98.26	93.67	108.21	17.4181	1117.14	1027.92	1071.33	1072.13	36.4283	53.97	43.09	47.72	48.26	4.45812	0.18	0.05	0.1	0.11	0.0535413	2.05	3.26	2.61	2.64	0.494436	0.6	0.4	0.56	0.52	0.0864099	0.69	0.52	0.65	0.62
NGL	7.35	6.89	7.18	7.14	0.189912	124.14	124.96	124.07	124.39	0.404063	4.5	4.78	4.67	4.65	0.115181	83.51	57.3	68.11	69.64	10.7547	1029.06	1119.72	1074.33	1074.37	37.0118	78.19	89.42	82.21	83.2733	4.64588	0.08	0.19	0.09	0.12	0.0496655	4.15	2.94	3.62	3.57	0.495244	0.63	0.39	0.48	0.5	0.0989949	0.93	1.06	0.98	0.99
XXSL	6.73	7.25	7.08	7.02	0.216487	80.87	80.11	80.16	80.38	0.347083	5.73	5.48	5.59	5.6	0.102307	138.85	172.5	139.67	150.34	15.6731	1498.66	1579.05	1538.84	1538.85	32.8191	87.59	76.6	81.21	81.8	4.506	0.18	0.06	0.09	0.11	0.0509902	2.41	4.04	2.52	2.99	0.743819	0.5	0.62	0.65	0.59	0.0648074	0.81	0.95	0.91	0.89
DN5L	5.68	6.11	5.94	5.91	0.176824	58.54	57.94	58.27	58.25	0.245357	3.4	3.72	3.62	3.58	0.133666	92.21	72.3	102.16	88.89	12.4143	878.9	965.4	921.73	922.01	35.314	42.1	31.44	37.01	36.85	4.3534	0.25	0.1	0.07	0.14	0.0787401	4.77	3.28	3.35	3.8	0.686489	0.56	0.72	0.61	0.63	0.0668331	0.81	0.65	0.73	0.73
ZXSL	6.56	7.32	6.7	6.86	0.330252	64.05	63.53	63.88	63.82	0.216487	5.75	5.48	5.57	5.6	0.11225	157.52	101.2	140.13	132.95	23.5464	1327.63	1407.77	1367.76	1367.72	32.717	98.6	87.32	91.94	92.62	4.63008	0.1	0.2	0.06	0.12	0.0588784	3.73	2.2	2.38	2.77	0.682788	0.51	0.37	0.44	0.44	0.0571548	0.48	0.65	0.55	0.56
JXSL	6.25	5.36	6.33	5.98	0.439621	96.41	95.99	96.2	96.2	0.171464	4.98	4.7	4.84	4.84	0.11431	177.15	196.41	180.78	184.78	8.35611	1812.6	1730.5	1771.4	1771.5	33.5173	87.32	76.07	82.52	81.97	4.60923	0.12	0.08	0.1	0.1	0.0163299	4.32	2.64	2.76	3.24	0.765245	0.87	1.02	0.9	0.93	0.0648074	1.1	0.91	0.93	0.98
DML	8.26	7.73	8.16	8.05	0.229928	90.33	89.79	90.12	90.08	0.222261	4.71	4.99	4.85	4.85	0.11431	154.24	180.833	193.23	176.101	16.2655	2019.65	2103.54	2061.76	2061.65	34.248	48.63	59.95	54.14	54.24	4.62191	0.1	0.2	0.09	0.13	0.0496655	4.4	2.27	3.08	3.25	0.877838	0.45	0.66	0.48	0.53	0.0927362	1.15	0.97	0.97	1.03
TXL	6.32	5.7	6.22	6.08	0.271784	83.6	83.02	83.34	83.32	0.237206	5.41	5.89	5.62	5.64	0.196469	116.7	93.26	108.25	106.07	9.6927	1123.52	1210.86	1168.57	1167.65	35.6623	88.78	77.55	83.15	83.16	4.58463	0.17	0.08	0.05	0.1	0.0509902	4.09	2.6	2.85	3.18	0.651511	0.69	0.53	0.64	0.62	0.0668331	1.18	0.98	0.99	1.05
JTL	6	6.85	6.68	6.51	0.367242	69.39	70.21	69.95	69.85	0.34215	5.08	4.79	4.95	4.94	0.118603	268.3	211	239.5	239.6	23.3927	1816.21	1721.26	1767.55	1768.34	38.7672	48.59	59.31	53.8	53.9	4.37699	0.15	0.09	0.09	0.11	0.0282843	4.33	2.84	2.91	3.36	0.686489	1.1	1.32	1.21	1.21	0.0898146	1.02	0.87	0.93	0.94
SSDL	4.27	4.85	5.04	4.72	0.327516	94.5	95.6	94.9	95	0.454606	4.7	5.15	4.88	4.91	0.184932	189.5	210.6	198.1	199.4	8.66295	2362.45	2469.66	2431	2421.04	44.3317	71.3	57.8	64.7	64.6	5.51181	0.107	0.163	0.105	0.125	0.0268825	5.3	7.04	7.37	6.57	0.908075	0.69	0.96	0.87	0.84	0.11225	0.65	1.02	0.79	0.82
SSHMSL	6.36	6.99	7.08	6.81	0.320312	108.9	108.3	109.5	108.9	0.489898	3.15	3.55	3.44	3.38	0.168721	267.5	290.2	278.4	278.7	9.26966	2765	2683.55	3002	2816.85	135.078	61.6	49.4	54	55	5.03057	0.087	0.144	0.09	0.107	0.0261916	4.01	6.51	5.05	5.19	1.02541	0.95	1.26	1.18	1.13	0.131403	0.83	1.09	0.9	0.94
SSTESL	3.2	3.81	3.76	3.59	0.276526	62.1	63.2	63.4	62.9	0.571548	2.79	3.2	3.01	3	0.167531	126.1	147.4	136.3	136.6	8.69828	1703	1601.25	1646	1650.08	41.6395	38.9	26.8	31.8	32.5	4.96454	0.023	0.077	0.02	0.04	0.0261916	4.61	6.89	5.72	5.74	0.930914	0.31	0.58	0.43	0.44	0.110454	0.8	0.71	0.56	0.69
SSKWSL	3.68	3.02	3.14	3.28	0.287054	107.2	108.1	107.2	107.5	0.424264	3.21	3.68	4.09	3.66	0.359537	273.5	295	282.9	283.8	8.80038	3030.75	3130	3076	3078.92	40.5711	45	33.1	39.5	39.2	4.86278	0.137	0.086	0.08	0.101	0.0255734	4.34	6.14	4.58	5.02	0.797997	0.74	1.04	0.86	0.88	0.123288	0.94	0.6	0.59	0.71
DNSL	5.45	5.43	5.44	5.44	0.00816497	106.7	96.7	96.7	100.033	4.71405	1.7	1.17	1.55	1.47333	0.22306	213	192.9	223.8	209.9	12.8039	2074	2026	2119.21	2073.07	38.0585	42.2	39.6	47.6	43.1333	3.332	0.118	0.099	0.156	0.124333	0.0236972	6	5.57	6.9	6.15667	0.554156	0.9	0.75	0.79	0.813333	0.063421	0.7	0.61	0.81	0.706667
HLSL	4.65	4.07	4.45	4.39	0.240555	88.2	89.3	88	88.5	0.571548	1.32	1.83	1.5	1.55	0.211187	174.5	195.7	183.6	184.6	8.6837	2427.75	2528.85	2480	2478.87	41.2817	44	54.9	47.8	48.9	4.51737	0.032	0.069	0.067	0.056	0.0169902	4.34	7.43	4.85	5.54	1.35255	0.47	0.76	0.51	0.58	0.128323	0.75	0.45	0.48	0.56
SWSL	6.98	6.35	6.47	6.6	0.27313	124.8	125.1	127.2	125.7	1.06771	2.22	2.7	2.49	2.47	0.196469	211	232.5	221.9	221.8	8.77762	2511	2613	2556	2560	41.7373	48.1	61.2	53.3	54.2	5.38578	0.076	0.045	0.047	0.056	0.0141657	5.61	7.95	7.35	6.97	0.992371	0.94	1.18	1.03	1.05	0.0989949	1.69	1.28	1.41	1.46
ZLTSL1	3.1	3.74	3.6	3.48	0.274712	72.5	74.2	73.5	73.4	0.697615	7.91	7.85	8.12	7.96	0.115758	215.27	237.6	223.93	225.6	9.19235	1820	1722	1774	1772	40.0333	76.6	63.5	69.3	69.8	5.35973	0.092	0.141	0.085	0.106	0.0249132	3.68	6.19	4.83	4.9	1.0259	0.68	1.27	0.93	0.96	0.241799	0.71	0.98	0.83	0.84
ZLTSL2	3.98	4.61	4.79	4.46	0.347275	59.6	58.3	45.9	54.6	6.17468	5.47	5.61	5.51	5.53	0.0588784	232.26	210.56	218.38	220.4	8.9734	1539	1637	1591	1589	40.0333	48.1	35.5	40.3	41.3	5.1923	0.23	0.18	0.175	0.195	0.0248328	6.33	8.65	7.58	7.52	0.948086	0.51	0.72	0.57	0.6	0.0883176	0.57	0.9	0.63	0.7
ZLTSL3	4.75	5.34	5.33	5.14	0.275802	103.6	115.3	139.6	119.5	14.994	3.7	4.18	3.76	3.88	0.213542	306.71	328.02	315.97	316.9	8.72459	2726	2632	2682	2680	38.4014	80	67	76.5	74.5	5.49242	0.132	0.091	0.104	0.109	0.0171075	7.91	9.95	7.91	8.59	0.961665	0.49	0.87	0.35	0.57	0.219697	1.47	1.15	1.28	1.3
HEBSL1	5.32	5.9	5.91	5.71	0.275802	67.1	68.8	74.4	70.1	3.11876	4.06	4.41	4.34	4.27	0.151217	233.25	254.37	242.88	243.5	8.63334	1901	2002	1959	1954	41.3844	26.3	40.1	32.6	33	5.64092	0.123	0.175	0.119	0.139	0.0255082	6.25	8.67	7.31	7.41	0.990488	0.45	0.78	0.54	0.59	0.139284	0.62	0.92	0.74	0.76
HEBSL2	13.18	13.75	14.47	13.8	0.527826	75.6	78.7	91.9	82.0667	7.06745	2.95	3.22	3.16	3.11	0.115758	173.88	195.31	183.11	184.1	8.77672	2068	2166	2111	2115	40.1082	59	72.8	65.9	65.9	5.63383	0.123	0.177	0.18	0.16	0.0261916	7.04	9.21	8.56	8.27	0.909322	0.56	0.94	0.69	0.73	0.157692	0.51	0.85	0.56	0.64
average	5.58186	5.67857	5.76271	5.67438	0.0738941	77.3153	77.2839	77.2094	77.2695	0.0443886	4.12714	4.16714	4.15771	4.15067	0.0170734	140.116	143.946	143.623	142.562	1.73427	1600.21	1638.67	1632.6	1623.83	16.8838	58.1251	59.2419	58.6091	58.6587	0.457242	0.119614	0.1096	0.0919571	0.107057	0.0114333	4.14843	4.442	4.06629	4.2189	0.161277	0.506571	0.63	0.556	0.56419	0.0507212	0.684714	0.702857	0.665286	0.684286
maximum	13.71	14.32	14.6	14.21	0.371573	133.54	127.7	139.6	133.613	4.85843	14.96	15.3	15.13	15.13	0.138804	306.71	328.02	315.97	316.9	8.72459	3030.75	3130	3076	3078.92	40.5711	122.45	111.41	115.64	116.5	4.5479	0.25	0.2	0.2	0.216667	0.0235702	8.63	9.95	8.56	9.04667	0.639392	1.15	1.32	1.21	1.22667	0.0703957	1.69	1.3	1.44	1.47667
minimum	2.05	2.47	1.85	2.12333	0.258371	40.6	41.6	42	41.4	0.588784	0.57	0.4	0.55	0.506667	0.0758654	59.5	40.59	56.61	52.2333	8.31719	585	674.96	618	625.987	37.1577	23.24	16.8	23.19	21.0767	3.02413	0.022	0.02	0.02	0.0206667	0.000942809	1.73	1.65	1.73	1.70333	0.0377124	0.06	0.21	0.09	0.12	0.0648074	0.16	0.25	0.17	0.193333
range	11.66	11.85	12.75	12.0867	0.475418	92.94	86.1	97.6	92.2133	4.72289	14.39	14.9	14.58	14.6233	0.210449	247.21	287.43	259.36	264.667	16.8431	2445.75	2455.04	2458	2452.93	5.21886	99.21	94.61	92.45	95.4233	2.81905	0.228	0.18	0.18	0.196	0.0226274	6.9	8.3	6.83	7.34333	0.677069	1.09	1.11	1.12	1.10667	0.0124722	1.53	1.05	1.27	1.28333
SD	2.32467	2.25736	2.30658	2.2962	0.0284414	21.4465	20.763	21.5665	21.2587	0.353886	2.40995	2.3618	2.38247	2.38474	0.0197243	58.6064	60.3808	59.0729	59.3534	0.751038	548.578	542.118	548.152	546.283	2.94986	23.9121	22.6358	22.4356	22.9945	0.653964	0.0582826	0.0417843	0.0347573	0.0449414	0.00986022	1.47961	1.95076	1.68011	1.7035	0.193057	0.238189	0.246704	0.231439	0.238777	0.00624579	0.303328	0.240969	0.263735	0.269344
CV	0.416468	0.397522	0.400258	0.40475	0.00836131	0.27739	0.26866	0.279325	0.275125	0.00463949	0.583928	0.566767	0.573023	0.574573	0.00709098	0.41827	0.419469	0.411305	0.416348	0.00359936	0.342817	0.330829	0.335754	0.336467	0.00492012	0.41139	0.382092	0.3828	0.392094	0.0136474	0.487255	0.381243	0.377973	0.41549	0.0507627	0.356668	0.439164	0.413181	0.403004	0.0344389	0.470198	0.391594	0.416257	0.426016	0.0328237	0.442999	0.342842	0.396424	0.394089
[truncated: 11 more columns]

## Sheet: Sheet3
peel
Na	1	0.48045	0.2267	0.54067	0.43269	0.09453	0.51361	0.28724	0.49756	0.34462	0.01493	-0.17401	Na	**		**	**		**	*	**	**
Mg	0.48045	1	0.34913	0.51912	0.27315	0.44089	0.66958	0.57537	0.60183	0.44634	0.03239	-0.03849	0.48	Mg	**	**	*	**	**	**	**	**
Al	0.2267	0.34913	1	0.38531	0.26323	0.09011	0.38105	0.68928	0.40003	0.72243	0.19284	0.28779	0.23	0.35	Al	**	*		**	**	**	**		*
P	0.54067	0.51912	0.38531	1	0.7019	0.02014	0.72903	0.51577	0.67316	0.62467	0.21843	-0.14885	0.54	0.52	0.39	P	**		**	**	**	**
K	0.43269	0.27315	0.26323	0.7019	1	-0.19208	0.45892	0.34852	0.51736	0.54415	0.28503	-0.30112	0.43	0.27	0.26	0.7	K		**	**	**	**	*	*
Ca	0.09453	0.44089	0.09011	0.02014	-0.19208	1	0.29846	0.1683	0.12173	-0.05473	0.07666	0.05873	0.095	0.44	0.09	0.02	-0.19	Ca	*
Cr	0.51361	0.66958	0.38105	0.72903	0.45892	0.29846	1	0.61878	0.62831	0.52478	0.10927	-0.08369	0.51	0.67	0.38	0.73	0.46	0.3	Cr	**	**	**
Fe	0.28724	0.57537	0.68928	0.51577	0.34852	0.1683	0.61878	1	0.55787	0.57875	0.18871	0.14992	0.29	0.58	0.69	0.52	0.35	0.17	0.62	Fe	**	**
Cu	0.49756	0.60183	0.40003	0.67316	0.51736	0.12173	0.62831	0.55787	1	0.56314	0.16615	0.00215	0.5	0.6	0.4	0.67	0.52	0.12	0.63	0.56	Cu	**
Zn	0.34462	0.44634	0.72243	0.62467	0.54415	-0.05473	0.52478	0.57875	0.56314	1	0.27561	0.05937	0.34	0.45	0.72	0.62	0.54	-0.055	0.52	0.58	0.56	Zn	*
Cd	0.01493	0.03239	0.19284	0.21843	0.28503	0.07666	0.10927	0.18871	0.16615	0.27561	1	0.02328	0.015	0.032	0.19	0.22	0.29	0.077	0.11	0.19	0.17	0.28	Cd
Pb	-0.17401	-0.03849	0.28779	-0.14885	-0.30112	0.05873	-0.08369	0.14992	0.00215	0.05937	0.02328	1	-0.17	-0.038	0.29	-0.15	-0.3	0.059	-0.084	0.15	0.0021	0.059	0.023	Pb
pulp
Na	1	0.18872	0.66183	0.20353	0.22631	0.18849	0.57347	0.06195	0.31506	0.41381	0.18081	0.4351	Na		**				**		**	**		**
Mg	0.18872	1	0.05368	0.4656	0.51746	0.47854	-0.06255	0.21523	0.41236	0.59287	0.35514	0.12978	0.19	Mg		**	**	**			**	**	**
Al	0.66183	0.05368	1	0.13215	0.08009	0.29178	0.4042	0.00283	0.3484	0.36163	0.03863	0.49408	0.66	0.054	Al			*	**		**	**		**
P	0.20353	0.4656	0.13215	1	0.75978	0.01919	0.23697	0.49597	0.65979	0.54913	0.34812	0.13423	0.2	0.47	0.13	P	**		*	**	**	**	**
K	0.22631	0.51746	0.08009	0.75978	1	0.07507	0.09315	0.30603	0.55644	0.48255	0.41129	0.21447	0.23	0.52	0.08	0.76	K			**	**	**	**
Ca	0.18849	0.47854	0.29178	0.01919	0.07507	1	0.06859	-0.00136	0.21079	0.37336	0.14118	0.21609	0.19	0.48	0.29	0.019	0.075	Ca				**
Cr	0.57347	-0.06255	0.4042	0.23697	0.09315	0.06859	1	0.14235	0.13071	0.19709	0.09974	0.28454	0.57	-0.063	0.4	0.24	0.093	0.069	Cr					*
Fe	0.06195	0.21523	0.00283	0.49597	0.30603	-0.00136	0.14235	1	0.32963	0.17766	0.20581	-0.16648	0.062	0.22	0.0028	0.5	0.31	-0.0014	0.14	Fe	**
Cu	0.31506	0.41236	0.3484	0.65979	0.55644	0.21079	0.13071	0.32963	1	0.69176	0.12803	0.29115	0.32	0.41	0.35	0.66	0.56	0.21	0.13	0.33	Cu	**		*
Zn	0.41381	0.59287	0.36163	0.54913	0.48255	0.37336	0.19709	0.17766	0.69176	1	0.47229	0.61957	0.41	0.59	0.36	0.55	0.48	0.37	0.2	0.18	0.69	Zn	**	**
Cd	0.18081	0.35514	0.03863	0.34812	0.41129	0.14118	0.09974	0.20581	0.12803	0.47229	1	0.41998	0.18	0.36	0.039	0.35	0.41	0.14	0.1	0.21	0.13	0.47	Cd	**
Pb	0.4351	0.12978	0.49408	0.13423	0.21447	0.21609	0.28454	-0.16648	0.29115	0.61957	0.41998	1	0.44	0.13	0.49	0.13	0.21	0.22	0.28	-0.17	0.29	0.62	0.42	Pb

## Sheet: Sheet4
peel			Na	Mg	Al	P	K	Ca	Cr	Fe	Cu	Zn	Cd	Pb		pulp			Na	Mg	Al	P	K	Ca	Cr	Fe	Cu	Zn	Cd	Pb
	Domesticated varieties	HLL	9.6	117	6.35	388.4	2643	189.4	0.35	8.75	0.94	1.53	0.0069	0.0379			Domesticated varieties	SPL	3.72	69	2.37	135.3	1818	40	0.11	2.54	0.4	0.45	0.0074	0.0181
	Cultivated varieties	HJQL	44.23	259.5	6.76	361	3099	192	0.46	10.21	1.79	2.06	0.0037	0.026				ML	2.85	96.4	1.39	149.8	1886	46.5	0.04	7.24	0.72	0.57	0.0044	0.012
	Wild resources	SSDL	8.98	251.7	9.8	287.9	3209	261.7	0.36	12.3	1.94	2	0.0074	0.0346				BLL	5.85	89.64	5.22	126.65	1899.24	66.98	0.1	3.75	0.74	0.95	0.0021	0.0253
		SSHMSL	17.31	106.9	9.93	282	3125	92.6	0.38	12.06	2.6	1.9	0.0099	0.0417				HTL	7.41	106.26	5.15	150.26	1882.61	98.18	0.12	3.99	0.57	0.94	0.0052	0.0231
		SSKWSL	7.98	198.5	9.28	253.4	2847	134.6	0.35	14.05	2.02	1.72	0.0066	0.0258				TL	7.7	63.72	6.51	53.64	1897.61	104.59	0.13	2.94	0.5	0.59	0.0058	0.027
		HLSL	12.1	182.8	9.81	235	2599	181.1	0.44	12.17	1.7	1.72	0.0075	0.03				BLXL	6.19	87.88	4.82	123.8	1975.94	62.65	0.1	3.05	0.71	0.74	0.0044	0.0222
		SWSL	13.64	250.4	10.17	219.4	2821	167.5	0.46	15.68	2.14	2.69	0.0076	0.037				SL	5.78	68.09	4.75	136.1	1971.25	99.08	0.09	3.53	0.43	0.49	0.0046	0.0217
		ZLTSL1	10.4	202.5	30.62	268.4	2594	284.7	0.42	18.99	2.69	2.51	0.0049	0.044			Cultivated varieties	QYL	14.21	78.3	15.13	197.5	1918	51.1	0.14	5.59	0.75	0.49	0.002	0.0142
		ZLTSL3	19.69	172.96	28.28	350.1	3008.3	318.54	0.37	12.79	1.91	3.34	0.0111	0.014			Wild resources	HEBSL1	5.71	70.1	4.27	243.5	1954	33	0.14	7.41	0.59	0.76	0.0026	0.018
			15.9922	193.584	13.4444	293.956	2882.81	202.46	0.398889	13	1.97	2.16333	0.00728889	0.0323333				HGL	3.06	82.8	1.83	129.1	1716	45.7	0.08	4.13	0.41	0.33	0.0027	0.013
																		JXSL	5.98	96.2	4.84	184.78	1771.5	81.97	0.1	3.24	0.93	0.98	0.0026	0.0299
																		JTL	6.51	69.75	4.94	239.6	1768.34	53.9	0.11	3.36	1.21	0.94	0.0028	0.0381
																	Wild resources	ZLTSL1	3.48	73.4	7.96	225.6	1772	69.8	0.11	4.9	0.96	0.84	0.0054	0.0195
	Domesticated varieties	DXL	11.79	277.7	13.38	219.8	1257	263.3	0.35	9.3	1.17	0.98	0.0028	0.033			Domesticated varieties	CBZL	6.89	86.78	5.25	131.15	2113.73	101.21	0.12	3.43	0.54	0.91	0.0071	0.0268
		PDXL	6.69	139.97	6.5	160.77	1499.6	146.12	0.11	11.44	1.13	1.12	0.0063	0.0361			Wild resources	HEBSL2	13.8	82.1	3.11	184.1	2115	65.9	0.16	8.27	0.73	0.64	0.007	0.0182
		PDX2	11.76	234.3	16.8	194.4	1064	355.2	0.44	14.73	1.71	1.5	0.007	0.0841			Cultivated varieties	DML	8.05	90.08	4.85	176.1	2061.65	54.24	0.13	3.25	0.53	1.03	0.0051	0.0382
		QPCL	7.83	132.3	8.26	186.3	1349	225.8	0.31	9.7	0.92	0.94	0.0031	0.0422			Wild resources	DNSL	5.44	96.7	1.44	202.95	2050	40.9	0.11	5.79	0.83	0.66	0.0032	0.0154
		LHHXSL	8.25	236.6	7.96	186.3	1343	833.4	0.34	11.86	1.83	1.19	0.003	0.0314			Domesticated varieties	YBDJBL	8.54	126.95	5.77	257.22	2042.13	79.19	0.13	3.76	0.85	1.18	0.0026	0.0256
		XCZL	6.49	72.2	13.13	73.05	885.26	115.69	0.1	3.56	0.61	0.7	0.0032	0.0519				XHTL	6.22	59.95	5.2	174.22	2239.96	38.32	0.11	2.92	0.42	0.56	0.0036	0.0211
		LDL	5.91	176.87	6.87	151.09	1350.35	295.95	0.09	4.68	0.88	0.92	0.0044	0.0447				XPXL	2.59	56.6	0.62	128.8	1390	35.3	0.09	1.83	0.18	0.4	0.0024	0.012
		HMXSX	6	150.36	7.99	212.04	1475.62	145.1	0.09	5.35	1.32	1.34	0.0098	0.0438				HMXSX	6.72	69.37	6.36	117.01	1415.03	45.98	0.11	2.89	0.73	0.77	0.0054	0.0345
		SLGZL	5.32	104.69	6.21	90.88	1393.91	71.67	0.08	4.1	0.66	0.93	0.0039	0.04				LHHXSL	2.87	98.3	1.76	108.1	1402	59.7	0.08	3.41	0.4	0.31	0.001	0.0129
		DXSL	5.65	165.97	6.84	118.53	1548.31	188.05	0.08	4.68	1.02	0.83	0.0021	0.0492				ZXSL	6.86	63.82	5.6	132.95	1367.72	92.62	0.12	2.77	0.44	0.56	0.0014	0.0226
		YHL	7.05	134.24	6.1	90.6	975.21	304.07	0.11	4.26	0.38	0.84	0.005	0.047				XCZL	5.33	47.49	3.87	80.83	1343.3	46.41	0.09	2.61	0.42	0.56	0.0034	0.0235
		FXL	5.98	128.58	6.11	142.36	1275.45	106.51	0.09	5.05	1.41	1.42	0.005	0.044				HLL	4.6	97	2.11	149.3	1585	62.2	0.12	6.72	0.37	0.52	0.0027	0.0133
		QXSL	6.59	143.24	9.54	188.12	1453.34	174.42	0.11	5.93	1.12	1.33	0.0052	0.0757				MTHL	5.9	75.08	4.7	125.47	1609.77	28.73	0.1	4.45	0.56	0.68	0.0027	0.0207
		TXDYXL	5.94	99.24	8.64	127.48	1567.74	187.07	0.1	10.51	0.74	1.14	0.0066	0.0479				AL	4.57	74.38	3.75	116.74	1593.57	41.52	0.08	2.94	0.43	0.57	0.0014	0.0218
		SL	7.85	109.1	11.65	113.79	1517.43	307.76	0.12	12.02	0.7	0.82	0.0052	0.0485				HJQL	5.62	56.9	1.26	127.3	1597	29.1	0.16	4.64	0.58	0.49	0.0015	0.011
		DWBKSL	5.12	110.51	10.77	118.27	1553.01	160.7	0.08	4.01	0.71	0.87	0.0066	0.0317			Wild resources	SSTESL	3.59	62.9	3	136.6	1650	32.5	0.04	5.74	0.44	0.69	0.0023	0.0197
	Cultivated varieties	DNGL	9.14	218.3	6.13	187.8	1000	419.1	0.33	8.2	1.17	1.16	0.0034	0.0264			Domesticated varieties	LDL	10.4	107.33	6.81	141.95	1648.46	88.38	0.17	4.23	0.48	0.73	0.003	0.0318
		YY351L	9.69	198.8	12.24	171.8	1148	638.5	0.41	13.88	1.56	1.34	0.0052	0.0752			Wild resources	ZLTSL2	4.46	54.6	5.53	220.4	1589	41.3	0.2	7.52	0.6	0.7	0.0041	0.019
		YY1L	5.1	118.6	8.64	130.5	886.23	94.6	0.08	17.2	1.08	1.01	0.0026	0.0482			Domesticated varieties	YHL	5.96	107.19	5.01	100.45	1541.15	116.5	0.11	2.95	0.28	0.74	0.0068	0.0294
		CXL	7.08	101.41	6.72	183.06	1568.52	93.23	0.09	6.4	1.61	1.55	0.0036	0.0549				HLJHGL	5.83	105.87	4.19	105.49	1516.5	92.58	0.09	2.78	0.37	0.85	0.0051	0.0299
		WX	6.77	148.98	8.79	155.82	1409.04	279.44	0.11	7.18	1.03	1.29	0.0068	0.0594				QPHL	5.32	60.96	4.13	109.56	1548.93	69.36	0.09	2.93	0.53	0.66	0.0046	0.0273
		NGL	6.73	203.21	7.8	123.85	1287.47	453.06	0.11	5.71	0.96	1.61	0.0097	0.0449			Cultivated varieties	XXSL	7.02	80.38	5.6	150.34	1538.85	81.8	0.11	2.99	0.59	0.89	0.0039	0.0244
		DN5L	5.67	150.25	6.49	123.03	898.72	165.02	0.09	3.97	1.06	1.03	0.0039	0.0389				DXS	4.76	116.74	6.06	176.03	1580.53	129.48	0.07	5.86	1.23	1.17	0.0042	0.022
		JXSL	5.33	127.44	9.02	143.51	1609.52	308.26	0.09	4.84	1.04	0.88	0.0025	0.0378			Domesticated varieties	QHL	6.6	125.08	7.6	142.72	1395.77	363.96	0.11	4.94	0.83	1.1	0.0023	0.0237
		DML	5.13	160.55	8.75	142.1	1491.36	158.65	0.09	5.66	0.96	1.5	0.0069	0.0757					6.11865	82.543	4.66919	151.119	1734.2	72.7197	0.11	4.19703	0.602162	0.714595	0.00375135	0.0223486
		TXL	5.6	104.4	7.38	114.27	1069.98	200.52	0.09	5.31	0.8	1.49	0.0054	0.0467
			6.94077	151.839	8.79654	148.058	1302.96	257.353	0.157308	7.67423	1.06077	1.14346	0.00496923	0.0484346
			Na	Mg	Al	P	K	Ca	Cr	Fe	Cu	Zn	Cd	Pb
																		DXL	3.27	55.3	1.44	92.2	943	35.6	0.04	2.78	0.33	0.37	0.0033	0.0142
																		YY1L	7	49.55	5.29	96.88	923.26	31.77	0.12	2.9	0.62	0.7	0.0017	0.0256
	Domesticated varieties	SPL	9.13	242	9.32	197.7	1943	363.3	0.18	21.46	1.73	1.04	0.0111	0.03				DN5L	5.91	58.25	3.58	88.89	922.01	36.85	0.14	3.8	0.63	0.73	0.0025	0.0276
		XPXL	7.78	208.2	5.64	193	1680	261.4	0.34	7.67	0.89	1.79	0.002	0.023				HXL	3.05	41.4	1.67	78.6	908	23.5	0.08	7.21	0.5	0.37	0.0014	0.011
		WXL	11.49	162.2	9.17	159.3	1942	228.6	0.21	9.54	0.73	0.92	0.0042	0.0231				QXSL	6.66	58.79	5.04	74.24	953.7	52.81	0.11	3.69	0.45	0.63	0.0019	0.0329
		PDX1	11.55	254.1	16.5	222.6	1669	455.5	0.36	16.72	1.35	1.32	0.0059	0.0653			Cultivated varieties	DNGL	2.76	67.9	1.44	77.2	908	59.5	0.05	5.07	0.32	0.38	0.003	0.013
		HGL	8.95	223.1	8.32	238.2	1961	362.4	0.44	11.75	1.46	0.95	0.0038	0.0382				FX	3.54	99.3	0.78	69.3	917	51.9	0.08	2.68	0.12	0.27	0.0019	0.0116
		ML	8.06	219.2	8.16	189	1745	114.8	0.15	7.48	1.3	1.37	0.0081	0.0291				JXL	2.62	62.2	4	83.3	883	25.5	0.06	3.71	0.4	0.33	0.0023	0.013
		HXL	8.63	199.9	8.91	249.6	2357	143.5	0.31	9.68	1.64	1.91	0.0041	0.0363				CXL	7.94	45	12.78	82.32	794.64	51.17	0.14	6.09	0.6	0.66	0.0018	0.0395
		HHGL	6.35	133.79	6.34	139.34	2173.17	252.75	0.1	4.5	1.04	1	0.0054	0.0529				WXL	3.28	68.3	1.26	86.5	1228	70.9	0.1	3.13	0.37	0.42	0.003	0.0122
		CBZL	7.14	132.83	7.59	114.13	1796.13	318.05	0.11	5.1	0.85	1.07	0.0071	0.0464				DWBKSL	5.98	65.27	4.04	87.27	1241.2	62.16	0.1	3.01	0.38	0.59	0.0043	0.0228
		BLL	6.13	137.46	6.03	164.54	2000.88	159.67	0.09	4.35	1	1.07	0.0028	0.0329				SLGZL	4.18	59.38	3.01	78.27	1219.46	28.93	0.08	2.46	0.39	0.6	0.0027	0.0206
		JBL	6.91	106.16	6.61	153.72	2082.38	119.95	0.11	4.04	0.96	1.68	0.006	0.0392				PDX1	3.93	69.3	1.87	89.1	1272	43.4	0.12	4.34	0.22	0.4	0.0025	0.0119
		XHTL	5.08	120.72	5.66	129.9	1873.95	100.22	0.08	3.56	0.85	0.91	0.0042	0.0324				PDXL	6.4	69.12	4.35	153.56	1246.55	39.18	0.1	3.38	0.45	0.73	0.0047	0.0223
		QPHL	8.08	166.06	7.91	138.77	1902.59	269.39	0.14	6.66	1.17	1.08	0.0077	0.0516				FXL	7.06	52.09	5.77	107.92	1141.39	36.02	0.11	2.85	0.57	0.75	0.0025	0.0254
		QHL	6.93	103.35	4.96	195.52	1798.39	109.12	0.12	3.41	0.63	0.81	0.0024	0.0447				HPXL	7.93	60.5	5.11	130.84	1184.66	42.88	0.14	3.88	0.32	0.65	0.0033	0.0291
		YBDJBL	6.4	162.53	7.74	205.52	2218.57	160.51	0.1	4.76	1.48	1.43	0.0028	0.044			Cultivated varieties	LXL	3.22	65.2	0.93	148	1190	58.1	0.12	4.42	0.5	0.47	0.0041	0.012
		HLJHGL	6	140.55	12.74	155.34	1736.05	351.43	0.1	4.41	0.94	1.46	0.0094	0.044				YY351L	2.45	53.6	1.23	116.4	1174	62.6	0.1	5.68	0.37	0.34	0.0021	0.0124
		TL	5.79	84.88	5.99	76.07	1736.39	206.84	0.09	3.24	0.7	0.67	0.005	0.0336			Domesticated varieties	TXDYXL	6.98	64.64	4.64	90.34	1153.46	79.47	0.12	5.11	0.44	0.57	0.0045	0.0309
		HPXL	9.95	115.66	8.69	187.37	2071.78	83.14	0.14	6.65	0.65	1.23	0.0081	0.0616				TXL	6.08	83.32	5.64	106.07	1167.65	83.16	0.1	3.18	0.62	1.05	0.006	0.0352
		BLXL	5.85	153.36	5.33	139.88	2125.25	141.93	0.09	6.99	1.03	0.92	0.0049	0.0298				PDX2	2.74	62.5	2.21	124.23	1088.67	38.93	0.09	4.05	0.47	0.53	0.0028	0.0161
		MTHL	6.27	149.95	7.42	195.56	2019.78	64.05	0.11	15.83	1.05	1.1	0.0034	0.0386			Cultivated varieties	WX	6.58	62.96	4.4	108.21	1072.13	48.26	0.11	2.64	0.52	0.62	0.0037	0.0264
		AL	6.59	171.2	6.23	148.22	1916.88	157.85	0.12	9.02	0.88	0.78	0.0022	0.039				NGL	7.14	124.39	4.65	69.64	1074.37	83.51	0.12	3.57	0.5	0.99	0.0073	0.0273
		HTL	6.34	137.76	6.85	145.35	1864	211.88	0.1	8.44	0.77	1.17	0.0064	0.0411				QPCL	2.92	46.4	2.44	84.2	626	49.2	0.13	4.23	0.27	0.31	0.0012	0.011
	Cultivated varieties	FX	13.13	230.7	11.74	269.7	2310	391.2	0.44	13.25	1.05	1.62	0.0063	0.0495					4.98417	64.3608	3.64875	96.8117	1051.34	49.8042	0.1025	3.91083	0.431667	0.560833	0.00310417	0.021
		QYL	51.46	285	14.97	261	2251	301.3	0.36	11.81	2.73	1.67	0.0032	0.035
		JXL	10.72	238.5	18.31	265.8	2167	137.8	0.47	18.49	2.78	1.7	0.0044	0.0735
		LXL	8.78	240.2	16.43	238.5	1809	370.3	0.42	14.1	1.7	1.72	0.0082	0.04			Domesticated varieties	HHGL	5.43	83.24	5.62	126.7	2614.28	94.71	0.09	3.86	0.77	0.95	0.005	0.0512
		DXS	4.67	60.78	3.11	184.19	1749.62	43.01	0.08	3.57	0.81	0.74	0.0053	0.0373				DXSL	5.29	72.05	4.14	147.57	2538.34	60.21	0.11	3.47	0.65	0.51	0.0014	0.0258
		XXSL	5.97	125.09	9.32	144.94	1939.67	216.57	0.1	5.01	0.94	1.59	0.0054	0.0525				JBL	9.21	77.32	5.5	237.07	2520.2	68.17	0.17	4.42	1.02	1.41	0.008	0.0466
		ZXSL	7.73	131.79	7.3	142.32	1919.36	323.59	0.12	4.66	0.9	1.11	0.003	0.0484			Wild resources	SWSL	6.6	125.7	2.47	221.8	2560	54.2	0.06	6.97	1.05	1.46	0.0037	0.017
		JTL	6.43	187.82	7.26	275.62	1773.26	205.13	0.1	5.42	2.5	1.79	0.0045	0.0494				SSDL	4.72	95	4.91	199.4	2421	64.6	0.13	6.57	0.84	0.82	0.0037	0.0142
	Wild resources	SSTESL	9.6	163.4	7.97	197.9	1892	154.8	0.42	9.34	1.29	1.76	0.0039	0.0322				HLSL	4.39	88.5	1.55	184.6	2479	48.9	0.06	5.54	0.58	0.56	0.0073	0.0143
		DNSL	11.65	248.6	7.59	239.7	1953	155.6	0.44	10.3	1.78	2.86	0.0039	0.0372				SSHMSL	6.81	108.8	3.38	278.7	2817	55	0.11	5.19	1.13	0.94	0.0044	0.0135
		ZLTSL2	12.34	134	26.96	286.5	2012	119.2	0.41	17.12	1.49	2.53	0.0075	0.052				ZLTSL3	5.14	119.5	3.88	316.9	2680	74.5	0.11	8.59	0.57	1.3	0.016	0.043
		HEBSL1	10.54	254.9	47.35	243.1	2438	130.8	0.22	27.83	1.52	4.39	0.0044	0.074				SSKWSL	3.28	107.5	3.66	283.8	3079	39.2	0.1	5.02	0.88	0.71	0.0029	0.0261
		HEBSL2	15.15	167.2	12.38	229.3	2015	150.7	0.41	13.36	1.25	2.14	0.0067	0.04					5.65222	97.5122	3.90111	221.838	2634.31	62.1656	0.104444	5.51444	0.832222	0.962222	0.00582222	0.0279667
			9.53057	171.227	10.3657	191.92	1966.92	209.608	0.216571	9.41486	1.25257	1.46571	0.00524857	0.0427943					Na	Mg	Al	P	K	Ca	Cr	Fe	Cu	Zn	Cd	Pb
			Na	Mg	Al	P	K	Ca	Cr	Fe	Cu	Zn	Cd	Pb					6.11865	82.543	4.66919	151.119	1734.2	72.7197	0.11	4.19703	0.602162	0.714595	0.00375135	0.0223486
		1	15.9922	193.584	13.4444	293.956	2882.81	202.46	0.398889	13	1.97	2.16333	0.00728889	0.0323333					4.98417	64.3608	3.64875	96.8117	1051.34	49.8042	0.1025	3.91083	0.431667	0.560833	0.00310417	0.021
		2	6.94077	151.839	8.79654	148.058	1302.96	257.353	0.157308	7.67423	1.06077	1.14346	0.00496923	0.0484346					5.65222	97.5122	3.90111	221.838	2634.31	62.1656	0.104444	5.51444	0.832222	0.962222	0.00582222	0.0279667
		3	9.53057	171.227	10.3657	191.92	1966.92	209.608	0.216571	9.41486	1.25257	1.46571	0.00524857	0.0427943

## Sheet: Sheet5
	peel	Eigen value	Variance contribution (%)	Cumulative variance contribution (%)	Eigen value	Variance contribution (%)	Cumulative variance contribution (%)	Eigen value	Variance contribution (%)	Cumulative variance contribution (%)			Matrix of elements											score	y1	y2	y3	y4	y5	y
		5.181	43.173	43.173	5.181	43.173	43.173	3.284	27.366	27.366	Principal component 1 eigenvalue root	2.27618	Element	1	2	3	4	5	y1	y2	y3	y4	y5	SPL	1.71	0.46	-0.55	2.63	-0.58	0.92	COMPUTE y1=0.3726 * ZP + 0.3646 * ZCr + 0.3563 * ZCu + 0.3471 *ZZn + 0.3378* ZFe + 0.3233 * ZMg + 0.2930* ZK+ 0.2838 * ZAl + 0.2733 * ZNa - 0.0176 * ZPb + 0.0822 * ZCa + 0.1191 * ZCd.
		1.613	13.444	56.617	1.613	13.444	56.617	2.761	23.008	50.374	Principal component 2 eigenvalue root	1.27004	P	0.848	-0.28	0.033	-0.008	0.096	0.372554	-0.220465	0.0274904	-0.00809774	0.120852	DXL	0.67	0.32	-1.62	-0.91	-0.79	0.02	EXECUTE.
		1.441	12.006	68.623	1.441	12.006	68.623	1.501	12.505	62.88	Principal component 3 eigenvalue root	1.20042	Cr	0.83	-0.004	-0.279	-0.004	-0.019	0.364646	-0.00314951	-0.232419	-0.00404887	-0.0239186	XPXL	-0.05	-0.82	-1.4	-0.79	-1.49	-0.44	COMPUTE y2=-0.2205 * ZP - 0.0031 * ZCr - 0.0339 * ZCu + 0.0575 *ZZn + 0.2756* ZFe + 0.1394 * ZMg - 0.4220* ZK+ 0.3638 * ZAl - 0.2307 * ZNa + 0.5960 * ZPb + 0.3638 * ZCa + 0.0102 * ZCd.
		0.976	8.132	76.755	0.976	8.132	76.755	1.153	9.605	72.485	Principal component 4 eigenvalue root	0.98793	Cu	0.811	-0.043	-0.063	-0.062	0.221	0.356299	-0.0338572	-0.0524816	-0.0627575	0.278211	WXL	-0.77	-0.99	-0.86	-0.08	-1.08	-0.63	EXECUTE.
		0.631	5.257	82.011	0.631	5.257	82.011	1.143	9.526	82.011	Principal component 5 eigenvalue root	0.79436	Zn	0.79	0.073	0.388	-0.068	-0.152	0.347073	0.0574785	0.32322	-0.0688308	-0.191349	PDXL	-1.13	-0.26	0.64	0.3	-0.34	-0.44	COMPUTE y3=0.0275 * ZP - 0.2324 * ZCr - 0.0525 * ZCu + 0.3232 *ZZn + 0.0808* ZFe - 0.3865 * ZMg - 0.2191* ZK+ 0.3174 * ZAl - 0.2366 * ZNa + 0.2341 * ZPb - 0.5590 * ZCa + 0.3316 * ZCd.
													Fe	0.769	0.35	0.097	-0.06	-0.238	0.337847	0.275582	0.0808051	-0.060733	-0.299612	PDX1	1.95	2.46	-1	0.33	0.35	1.1	EXECUTE.
													Mg	0.736	0.177	-0.464	-0.012	-0.05	0.323349	0.139366	-0.386531	-0.0121466	-0.0629438	PDX2	1.74	3.41	0.17	0.05	1.59	1.32	COMPUTE y4= - 0.0081 * ZP - 0.0040 * ZCr - 0.0628 * ZCu - 0.0688 *ZZn - 0.0607* ZFe - 0.0121 * ZMg + 0.0779* ZK - 0.1296* ZAl - 0.1832* ZNa - 0.1802 * ZPb + 0.4272 * ZCa + 0.8462 * ZCd.
													K	0.667	-0.536	0.263	0.077	0.01	0.293035	-0.422034	0.21909	0.0779407	0.0125888	HGL	1.18	0.01	-1.98	-0.06	-0.35	0.25	EXECUTE.
													Al	0.646	0.462	0.381	-0.128	-0.237	0.283809	0.363768	0.317389	-0.129564	-0.298353	HLL	1.3	-1.96	0.07	0.72	0.34	0.38	COMPUTE y5= 0.1209 * ZP -0.0239 * ZCr + 0.2782 * ZCu - 0.1913 *ZZn - 0.2996* ZFe - 0.0629 * ZMg + 0.0126* ZK - 0.2984* ZAl + 0.4633* ZNa + 0.6483 * ZPb-0.0818 * ZCa + 0.2165 * ZCd.
													Na	0.622	-0.293	-0.284	-0.181	0.368	0.273265	-0.230701	-0.236584	-0.183211	0.463266	ML	-0.09	-0.88	0.28	0.92	-0.26	-0.06	EXECUTE.
													Pb	-0.04	0.757	0.281	-0.178	0.515	-0.0175733	0.596044	0.234085	-0.180175	0.648321	QPCL	-0.97	0.17	-0.32	-0.76	-0.35	-0.51
													Ca	0.187	0.462	-0.671	0.422	-0.065	0.0821552	0.363768	-0.558971	0.427156	-0.0818269	HXL	1.37	-1.06	-0.36	-0.66	-0.32	0.34
													Cd	0.271	0.013	0.398	0.836	0.172	0.119059	0.0102359	0.331551	0.846214	0.216527	LHHXSL	0.97	1.69	-3.81	1.11	-1.07	0.22
																								HHGL	-1.56	-0.09	-0.03	0.3	0.66	-0.63
																								XCZL	-3.4	0.84	1.31	-1.16	0.04	-1.29
																								CBZL	-1.71	0.28	0.06	1.15	0.27	-0.59
																								BLL	-1.71	-1.17	-0.27	-0.74	-0.46	-1.01
																								LDL	-1.85	0.43	-0.44	0.07	-0.01	-0.79
																								HMXSX	-0.8	-0.26	1.37	1.53	0.72	-0.05
																								SLGZL	-3	-0.44	0.83	-0.69	-0.25	-1.33
																								JBL	-1.39	-1.05	0.94	0.2	0.02	-0.61
																								XHTL	-2.35	-1.21	0.29	-0.32	-0.39	-1.19
																								DXSL	-2.18	0.23	-0.3	-1.17	0.09	-1.04
																								YHL	-2.94	0.85	-0.03	0.31	-0.02	-1.13
																								FXL	-1.7	-0.17	0.96	-0.41	0.31	-0.66
																								QXSL	-1.21	1.36	1.2	-0.56	1.55	-0.16
																								QPHL	-0.88	0.35	0.11	1.07	0.72	-0.2
																								QHL	-2.29	-0.97	0.18	-1.15	0.21	-1.18
																								YBDJBL	-0.59	-0.82	-0.14	-1	0.16	-0.45
																								HLJHGL	-0.95	0.51	0.68	2.03	0.1	-0.09
																								TL	-3.01	-0.71	0.13	0.32	-0.34	-1.37
																								HPXL	-1.08	-0.12	1.53	0.51	1.27	-0.19
																								BLXL	-1.51	-1.21	-0.17	0.06	-0.54	-0.86
																								MTHL	-0.56	-0.58	0.45	-1.07	-0.75	-0.39
																								AL	-1.51	-0.48	-0.57	-1.09	-0.54	-0.9
																								HTL	-1.43	-0.21	0.38	0.62	-0.21	-0.56
																								TXDYXL	-1.77	0.43	1.13	0.45	-0.09	-0.54
																								SL	-1.66	1.04	0.29	0.21	-0.33	-0.54
																								DWBKSL	-2.34	-0.5	0.81	0.66	-0.56	-0.96
																								DNGL	-0.29	0.27	-1.93	0.09	-0.96	-0.37
																								FX	2.21	0.45	-1.29	0.66	0.08	0.92
																								YY351L	0.95	3.48	-1.41	0.6	0.92	0.81
																								QYL	4.64	-1.43	-3.1	-1.83	2.29	1.41
																								JXL	3.64	1.54	0.19	-1.54	1.25	1.74
																								HJQL	4.61	-3.37	-2.89	-1.34	1.61	1.16
																								LXL	2.44	0.91	-0.57	1.29	-0.48	1.19
																								DXS	-2.68	-1.53	1.08	-0.08	0.26	-1.23
																								YY1L	-1.76	1.09	1.13	-1.55	-0.67	-0.64
																								CXL	-1.22	-0.1	1.15	-1.17	0.83	-0.45
																								WX	-1.23	1.13	0.65	0.6	0.75	-0.22
																								NGL	-0.89	1.23	-0.15	2.43	0.12	-0.03
																								XXSL	-1.33	0.19	0.73	0.06	0.27	-0.44
																								DN5L	-2.4	0.13	0.31	-0.53	-0.18	-1.03
																								ZXSL	-1.65	0.11	-0.61	-0.41	0.11	-0.8
																								JXSL	-1.97	-0.02	-0.56	-0.51	-0.52	-0.99
																								DML	-1.44	1.51	1.5	0.1	1.45	-0.15
																								TXL	-2.34	0.54	1.09	0.04	-0.04	-0.81
																								JTL	0.71	-0.31	0.12	-0.51	1.03	0.29
																								SSDL	3.19	-1.28	-1.07	0.99	-0.18	1.15
																								SSHMSL	3	-2.03	0.77	1.05	1.55	1.28
																								SSTESL	0.57	-0.87	-0.38	-0.65	-0.63	0
																								SSKWSL	2.31	-1.68	-0.4	0.39	-0.62	0.72
																								DNSL	2.42	-0.58	-0.51	-0.96	-0.41	0.8
																								HLSL	2.13	-1.35	-0.44	0.74	-0.21	0.73
																								SWSL	3.71	-0.81	-0.39	0.42	-0.16	1.47
																								ZLTSL1	4.62	1.02	0.33	-0.74	-0.99	2.06
																								ZLTSL2	3.03	0.86	2.14	-0.28	-0.38	1.64
																								ZLTSL3	5.16	-1.44	0.74	2.05	-1.2	2.23
																								HEBSL1	5.58	3.85	3.38	-2.33	-2.01	3.04
																								HEBSL2	1.78	-0.4	0.42	0	-0.14	0.76
		Initial eigenvalue			Retrieves squares and loads			Cyclic sum of squares loading					元件矩陣a
	pulp	Eigen value	Variance contribution (%)	Cumulative variance contribution (%)	Eigen value	Variance contribution (%)	Cumulative variance contribution (%)	Eigen value	Variance contribution (%)	Cumulative variance contribution (%)				元件
	1	4.422	36.852	36.852	4.422	36.852	36.852	3.048	25.401	25.401	Principal component 1 eigenvalue root	2.10286		1	2	3	4	5	y1	y2	y3	y4	y5		y1	y2	y3	y4	y5	y	COMPUTE y1=0.4123 * ZZn + 0.3605 * ZCu + 0.3524 * ZP + 0.3367 * ZK + 0.3029 * ZMg + 0.2810 * ZNa + 0.2715 * ZPb + 0.2401 * ZAl + 0.1859 * ZCa + 0.1817 * ZCr + 0.1712 * ZFe + 0.2520 * ZCd.
	2	2.068	17.236	54.088	2.068	17.236	54.088	2.429	20.244	45.645	Principal component 2 eigenvalue root	1.43805	Zn	0.867	0.017	-0.243	-0.061	-0.143	0.412296	0.0118216	-0.206555	-0.0594449	-0.154561	SPL	-1.11	-0.59	-0.3	-1.74	0.49	-0.66	EXECUTE.
	3	1.384	11.537	65.624	1.384	11.537	65.624	1.565	13.042	58.687	Principal component 3 eigenvalue root	1.17644	Cu	0.758	-0.169	0.115	0.265	-0.422	0.360461	-0.11752	0.0977525	0.258244	-0.456118	DXL	-3.46	-0.78	-0.94	-0.46	-0.58	-1.6	COMPUTE y2=0.0118 * ZZn - 0.1175 * ZCu - 0.3122 * ZP - 0.2997 * ZK- 0.2476 * ZMg + 0.4012 * ZNa + 0.3477 * ZPb + 0.4603* ZAl + 0.1196 * ZCa + 0.3449 * ZCr- 0.3178 * ZFe - 0.1001 * ZCd.
	4	1.053	8.772	74.396	1.053	8.772	74.396	1.44	11.997	70.685	Principal component 4 eigenvalue root	1.02616	P	0.741	-0.449	0.324	-0.022	-0.103	0.352377	-0.312228	0.275407	-0.0214392	-0.111327	XPXL	-3.26	-0.71	-0.28	-0.66	-0.27	-1.43	EXECUTE.
	5	0.856	7.135	81.531	0.856	7.135	81.531	1.302	10.847	81.531	Principal component 5 eigenvalue root	0.9252	K	0.708	-0.431	0.106	-0.144	-0.143	0.336684	-0.299711	0.0901023	-0.140329	-0.154561	WXL	-2.56	-0.45	-0.54	0.16	0.46	-1.04	COMPUTE y3=-0.2066 * ZZn + 0.0978 * ZCu + 0.2754 * ZP + 0.0901 * ZK- 0.3604 * ZMg + 0.2023 * ZNa-0.2108 * ZPb + 0.1012* ZAl - 0.4990 * ZCa + 0.4395 * ZCr + 0.4012 * ZFe - 0.1887 * ZCd.
	6	0.607	5.058	86.589									Mg	0.637	-0.356	-0.424	0.224	0.168	0.302921	-0.247557	-0.360409	0.21829	0.181582	PDXL	-0.46	0.44	0.02	-0.71	-0.1	-0.16	EXECUTE.
	7	0.475	3.955	90.544									Na	0.591	0.577	0.238	0.068	0.108	0.281046	0.401238	0.202305	0.0662665	0.116732	PDX1	-2.55	-0.28	0.47	0.04	1.01	-0.86	COMPUTE y4=-0.0594 * ZZn + 0.2582 * ZCu - 0.0214 * ZP - 0.1403 * ZK + 0.2183 * ZMg + 0.0663 * ZNa-0.4103 * ZPb + 0.2212* ZAl + 0.4785 * ZCa - 0.0292 * ZCr + 0.1822* ZFe - 0.6139 * ZCd.
	8	0.386	3.215	93.759									Pb	0.571	0.5	-0.248	-0.421	-0.187	0.271535	0.347693	-0.210805	-0.410267	-0.202118	PDX2	-2.15	-0.71	0.05	-0.08	-0.21	-0.93	EXECUTE.
	9	0.254	2.118	95.877									Al	0.505	0.662	0.119	0.227	-0.111	0.240149	0.460346	0.101153	0.221213	-0.119974	HGL	-1.98	-1.52	-0.14	0.18	0.04	-0.99	COMPUTE y5=-0.1546 * ZZn - 0.4561 * ZCu - 0.1113 * ZP - 0.1546 * ZK + 0.1816 * ZMg + 0.1167 * ZNa-0.2021 * ZPb - 0.1200* ZAl + 0.3664 * ZCa + 0.3642 * ZCr + 0.4280* ZFe + 0.4259 * ZCd.
	10	0.246	2.053	97.93									Ca	0.391	0.172	-0.587	0.491	0.339	0.185937	0.119606	-0.498963	0.478483	0.366407	HLL	-0.69	-1.38	0.74	0.76	1.51	-0.23	EXECUTE.
	11	0.143	1.188	99.118									Cr	0.382	0.496	0.517	-0.03	0.337	0.181657	0.344912	0.439461	-0.0292352	0.364246	ML	-0.52	-3.34	-0.23	0.49	0.06	-0.75	COMPUTE y=0.36852 * y1 + 0.17236 * y2 + 0.11537 * y3 + 0.08772 * y4 + 0.07135 * y5.
	12	0.106	0.882	100									Fe	0.36	-0.457	0.472	0.187	0.396	0.171195	-0.317791	0.40121	0.182233	0.428016	QPCL	-3.52	0.43	0.92	0.51	0.8	-1.02	EXECUTE.
	Extraction method: main component analysis.												Cd	0.53	-0.144	-0.222	-0.63	0.394	0.252038	-0.100136	-0.188705	-0.613939	0.425854	HXL	-3.13	-1.13	1.37	0.62	0.29	-1.11
													Extraction method: main component analysis.											LHHXSL	-2.37	-1.2	-0.75	0.93	-0.07	-1.09
																								HHGL	2.37	0.63	-1.54	-1.22	-1.28	0.61
																								XCZL	-1.85	0.92	-0.3	-0.69	-0.58	-0.66
																								CBZL	1.54	0.56	-0.97	-0.77	0.68	0.53
																								BLL	0.82	0.16	-0.47	0.59	-1.04	0.25
																								LDL	1.84	2.2	0.46	0.55	1.11	1.24
																								HMXSX	0.63	1.51	-0.33	-0.97	-0.82	0.31
																								SLGZL	-2.3	0.31	-0.56	-0.57	-0.8	-0.97
																								JBL	5.07	1.1	0.61	-1.94	-0.51	1.92
																								XHTL	-0.25	0.23	0.73	-0.7	-0.58	-0.07
																								DXSL	0.04	-0.18	0.42	0.18	-1.11	-0.03
																								YHL	0.48	0.86	-2.09	-0.62	1.39	0.13
																								FXL	-0.77	1.69	0.37	-0.21	-0.94	-0.03
																								QXSL	-1.16	1.93	-0.05	-0.15	-0.35	-0.14
																								QPHL	-0.64	0.59	-0.74	-0.7	-0.44	-0.31
																								QHL	3.23	1.12	-3.93	4.79	2.06	1.5
																								YBDJBL	3.42	-0.15	-0.06	1.03	-0.71	1.27
																								HLJHGL	0.27	0.48	-2.07	-0.46	0.36	-0.07
																								TL	0.16	2.03	-0.56	-0.44	0.7	0.36
																								HPXL	-0.46	1.85	0.84	-0.65	0.46	0.22
																								BLXL	0.53	0.06	-0.53	-0.07	-0.58	0.09
																								MTHL	-0.46	0.03	0.5	0.04	-0.46	-0.14
																								AL	-1.5	-0.04	-0.4	0.09	-0.96	-0.67
																								HTL	1.65	0.25	-0.78	0.22	0.67	0.63
																								TXDYXL	-0.41	1.36	0.05	-0.34	0.97	0.13
																								SL	-0.39	0.12	-0.56	-0.1	0.27	-0.18
																								DWBKSL	-1.3	0.92	-0.54	-0.51	0.21	-0.41
																								DNGL	-3.11	-1.22	-0.77	0.31	0.47	-1.39
																								FX	-3.45	-0.63	-1.24	0.36	0.72	-1.44
																								YY351L	-2.69	-1.07	0.64	0.45	0.76	-1.01
																								QYL	2.44	2.82	3.06	2.22	-0.01	1.93
																								JXL	-3.2	-0.43	-0.24	0.23	-0.52	-1.3
																								HJQL	-1.38	-0.16	2.03	0.34	0.38	-0.24
																								LXL	-1.69	-0.99	0.48	-0.08	0.76	-0.69
																								DXS	2.79	-1.32	-1.47	2	-0.78	0.75
																								YY1L	-1.09	1.9	0.63	0	-0.98	-0.07
																								CXL	0.41	3.84	1.59	0.61	-0.22	1.03
																								WX	-0.94	1.34	-0.15	-0.5	-0.36	-0.2
																								NGL	1.05	0.93	-1.91	-0.48	1.39	0.38
																								XXSL	0.69	0.88	-0.52	0.12	-0.3	0.33
																								DN5L	-0.87	1.43	0.61	-0.25	-0.26	-0.05
																								ZXSL	-0.76	1.51	0.03	0.75	-0.16	0.04
																								JXSL	1.7	0	-0.73	0.6	-1.44	0.49
																								DML	2.05	0.99	-0.28	-1.3	-0.29	0.76
																								TXL	0.93	1.29	-1.57	-0.78	-0.19	0.31
																								JTL	2.33	0.29	0.46	-0.07	-2.49	0.78
																								SSDL	1.77	-1.62	1.21	0.9	0.22	0.61
																								SSHMSL	3.16	-2.51	1	0.71	-0.93	0.84
																								SSTESL	-1.43	-1.54	-0.09	-0.05	-0.79	-0.86
																								SSKWSL	2.25	-2.7	0.69	-0.02	-1.47	0.34
																								DNSL	0.74	-2.05	0.97	0.49	-0.13	0.07
																								HLSL	0.26	-2.86	-0.22	-0.92	0.39	-0.48
																								SWSL	3.37	-3.17	-0.36	0.95	-1.05	0.66
																								ZLTSL1	1.66	-0.61	0.59	0.39	-0.74	0.56
																								ZLTSL2	0.92	0.06	3.21	-0.02	1.44	0.82
																								ZLTSL3	5.62	-2.69	-0.65	-3.71	2.5	1.39
																								HEBSL1	1	-1.1	2.48	0.33	0.45	0.53
																								HEBSL2	2.65	0.08	2.61	-0.01	2.46	1.47

## Sheet: Sheet6
			pulp	DXL	-3.46	-0.78	-0.94	-0.46	-0.58	-1.6	peel	TL	-3.01	-0.71	0.13	0.32	-0.34	-1.37
				FX	-3.45	-0.63	-1.24	0.36	0.72	-1.44		SLGZL	-3	-0.44	0.83	-0.69	-0.25	-1.33
				XPXL	-3.26	-0.71	-0.28	-0.66	-0.27	-1.43		XCZL	-3.4	0.84	1.31	-1.16	0.04	-1.29
				DNGL	-3.11	-1.22	-0.77	0.31	0.47	-1.39		DXS	-2.68	-1.53	1.08	-0.08	0.26	-1.23
				JXL	-3.2	-0.43	-0.24	0.23	-0.52	-1.3		XHTL	-2.35	-1.21	0.29	-0.32	-0.39	-1.19
				HXL	-3.13	-1.13	1.37	0.62	0.29	-1.11		QHL	-2.29	-0.97	0.18	-1.15	0.21	-1.18
				LHHXSL	-2.37	-1.2	-0.75	0.93	-0.07	-1.09		YHL	-2.94	0.85	-0.03	0.31	-0.02	-1.13
				WXL	-2.56	-0.45	-0.54	0.16	0.46	-1.04		DXSL	-2.18	0.23	-0.3	-1.17	0.09	-1.04
				QPCL	-3.52	0.43	0.92	0.51	0.8	-1.02		DN5L	-2.4	0.13	0.31	-0.53	-0.18	-1.03
				YY351L	-2.69	-1.07	0.64	0.45	0.76	-1.01		BLL	-1.71	-1.17	-0.27	-0.74	-0.46	-1.01
				HGL	-1.98	-1.52	-0.14	0.18	0.04	-0.99		JXSL	-1.97	-0.02	-0.56	-0.51	-0.52	-0.99
				SLGZL	-2.3	0.31	-0.56	-0.57	-0.8	-0.97		DWBKSL	-2.34	-0.5	0.81	0.66	-0.56	-0.96
				PDX2	-2.15	-0.71	0.05	-0.08	-0.21	-0.93		AL	-1.51	-0.48	-0.57	-1.09	-0.54	-0.9
				PDX1	-2.55	-0.28	0.47	0.04	1.01	-0.86		BLXL	-1.51	-1.21	-0.17	0.06	-0.54	-0.86
				SSTESL	-1.43	-1.54	-0.09	-0.05	-0.79	-0.86		TXL	-2.34	0.54	1.09	0.04	-0.04	-0.81
				ML	-0.52	-3.34	-0.23	0.49	0.06	-0.75		ZXSL	-1.65	0.11	-0.61	-0.41	0.11	-0.8
				LXL	-1.69	-0.99	0.48	-0.08	0.76	-0.69		LDL	-1.85	0.43	-0.44	0.07	-0.01	-0.79
				AL	-1.5	-0.04	-0.4	0.09	-0.96	-0.67		FXL	-1.7	-0.17	0.96	-0.41	0.31	-0.66
				SPL	-1.11	-0.59	-0.3	-1.74	0.49	-0.66		YY1L	-1.76	1.09	1.13	-1.55	-0.67	-0.64
				XCZL	-1.85	0.92	-0.3	-0.69	-0.58	-0.66		WXL	-0.77	-0.99	-0.86	-0.08	-1.08	-0.63
				HLSL	0.26	-2.86	-0.22	-0.92	0.39	-0.48		HHGL	-1.56	-0.09	-0.03	0.3	0.66	-0.63
				DWBKSL	-1.3	0.92	-0.54	-0.51	0.21	-0.41		JBL	-1.39	-1.05	0.94	0.2	0.02	-0.61
				QPHL	-0.64	0.59	-0.74	-0.7	-0.44	-0.31		CBZL	-1.71	0.28	0.06	1.15	0.27	-0.59
				HJQL	-1.38	-0.16	2.03	0.34	0.38	-0.24		HTL	-1.43	-0.21	0.38	0.62	-0.21	-0.56
				HLL	-0.69	-1.38	0.74	0.76	1.51	-0.23		TXDYXL	-1.77	0.43	1.13	0.45	-0.09	-0.54
				WX	-0.94	1.34	-0.15	-0.5	-0.36	-0.2		SL	-1.66	1.04	0.29	0.21	-0.33	-0.54
				SL	-0.39	0.12	-0.56	-0.1	0.27	-0.18		QPCL	-0.97	0.17	-0.32	-0.76	-0.35	-0.51
				PDXL	-0.46	0.44	0.02	-0.71	-0.1	-0.16		YBDJBL	-0.59	-0.82	-0.14	-1	0.16	-0.45
				QXSL	-1.16	1.93	-0.05	-0.15	-0.35	-0.14		CXL	-1.22	-0.1	1.15	-1.17	0.83	-0.45
				MTHL	-0.46	0.03	0.5	0.04	-0.46	-0.14		XPXL	-0.05	-0.82	-1.4	-0.79	-1.49	-0.44
				XHTL	-0.25	0.23	0.73	-0.7	-0.58	-0.07		PDXL	-1.13	-0.26	0.64	0.3	-0.34	-0.44
				HLJHGL	0.27	0.48	-2.07	-0.46	0.36	-0.07		XXSL	-1.33	0.19	0.73	0.06	0.27	-0.44
				YY1L	-1.09	1.9	0.63	0	-0.98	-0.07		MTHL	-0.56	-0.58	0.45	-1.07	-0.75	-0.39
				DN5L	-0.87	1.43	0.61	-0.25	-0.26	-0.05		DNGL	-0.29	0.27	-1.93	0.09	-0.96	-0.37
				DXSL	0.04	-0.18	0.42	0.18	-1.11	-0.03		WX	-1.23	1.13	0.65	0.6	0.75	-0.22
				FXL	-0.77	1.69	0.37	-0.21	-0.94	-0.03		QPHL	-0.88	0.35	0.11	1.07	0.72	-0.2
				ZXSL	-0.76	1.51	0.03	0.75	-0.16	0.04		HPXL	-1.08	-0.12	1.53	0.51	1.27	-0.19
				DNSL	0.74	-2.05	0.97	0.49	-0.13	0.07		QXSL	-1.21	1.36	1.2	-0.56	1.55	-0.16
				BLXL	0.53	0.06	-0.53	-0.07	-0.58	0.09		DML	-1.44	1.51	1.5	0.1	1.45	-0.15
				YHL	0.48	0.86	-2.09	-0.62	1.39	0.13		HLJHGL	-0.95	0.51	0.68	2.03	0.1	-0.09
				TXDYXL	-0.41	1.36	0.05	-0.34	0.97	0.13		ML	-0.09	-0.88	0.28	0.92	-0.26	-0.06
				HPXL	-0.46	1.85	0.84	-0.65	0.46	0.22		HMXSX	-0.8	-0.26	1.37	1.53	0.72	-0.05
				BLL	0.82	0.16	-0.47	0.59	-1.04	0.25		NGL	-0.89	1.23	-0.15	2.43	0.12	-0.03
				HMXSX	0.63	1.51	-0.33	-0.97	-0.82	0.31		SSTESL	0.57	-0.87	-0.38	-0.65	-0.63	0
				TXL	0.93	1.29	-1.57	-0.78	-0.19	0.31		DXL	0.67	0.32	-1.62	-0.91	-0.79	0.02
				XXSL	0.69	0.88	-0.52	0.12	-0.3	0.33		LHHXSL	0.97	1.69	-3.81	1.11	-1.07	0.22
				SSKWSL	2.25	-2.7	0.69	-0.02	-1.47	0.34		HGL	1.18	0.01	-1.98	-0.06	-0.35	0.25
				TL	0.16	2.03	-0.56	-0.44	0.7	0.36		JTL	0.71	-0.31	0.12	-0.51	1.03	0.29
				NGL	1.05	0.93	-1.91	-0.48	1.39	0.38		HXL	1.37	-1.06	-0.36	-0.66	-0.32	0.34
				JXSL	1.7	0	-0.73	0.6	-1.44	0.49		HLL	1.3	-1.96	0.07	0.72	0.34	0.38
				CBZL	1.54	0.56	-0.97	-0.77	0.68	0.53		SSKWSL	2.31	-1.68	-0.4	0.39	-0.62	0.72
				HEBSL1	1	-1.1	2.48	0.33	0.45	0.53		HLSL	2.13	-1.35	-0.44	0.74	-0.21	0.73
				ZLTSL1	1.66	-0.61	0.59	0.39	-0.74	0.56		HEBSL2	1.78	-0.4	0.42	0	-0.14	0.76
				HHGL	2.37	0.63	-1.54	-1.22	-1.28	0.61		DNSL	2.42	-0.58	-0.51	-0.96	-0.41	0.8
				SSDL	1.77	-1.62	1.21	0.9	0.22	0.61		YY351L	0.95	3.48	-1.41	0.6	0.92	0.81
				HTL	1.65	0.25	-0.78	0.22	0.67	0.63		SPL	1.71	0.46	-0.55	2.63	-0.58	0.92
				SWSL	3.37	-3.17	-0.36	0.95	-1.05	0.66		FX	2.21	0.45	-1.29	0.66	0.08	0.92
				DXS	2.79	-1.32	-1.47	2	-0.78	0.75		PDX1	1.95	2.46	-1	0.33	0.35	1.1
				DML	2.05	0.99	-0.28	-1.3	-0.29	0.76		SSDL	3.19	-1.28	-1.07	0.99	-0.18	1.15
				JTL	2.33	0.29	0.46	-0.07	-2.49	0.78		HJQL	4.61	-3.37	-2.89	-1.34	1.61	1.16
				ZLTSL2	0.92	0.06	3.21	-0.02	1.44	0.82		LXL	2.44	0.91	-0.57	1.29	-0.48	1.19
				SSHMSL	3.16	-2.51	1	0.71	-0.93	0.84		SSHMSL	3	-2.03	0.77	1.05	1.55	1.28
				CXL	0.41	3.84	1.59	0.61	-0.22	1.03		PDX2	1.74	3.41	0.17	0.05	1.59	1.32
				LDL	1.84	2.2	0.46	0.55	1.11	1.24		QYL	4.64	-1.43	-3.1	-1.83	2.29	1.41
				YBDJBL	3.42	-0.15	-0.06	1.03	-0.71	1.27		SWSL	3.71	-0.81	-0.39	0.42	-0.16	1.47
				ZLTSL3	5.62	-2.69	-0.65	-3.71	2.5	1.39		ZLTSL2	3.03	0.86	2.14	-0.28	-0.38	1.64
				HEBSL2	2.65	0.08	2.61	-0.01	2.46	1.47		JXL	3.64	1.54	0.19	-1.54	1.25	1.74
				QHL	3.23	1.12	-3.93	4.79	2.06	1.5		ZLTSL1	4.62	1.02	0.33	-0.74	-0.99	2.06
				JBL	5.07	1.1	0.61	-1.94	-0.51	1.92		ZLTSL3	5.16	-1.44	0.74	2.05	-1.2	2.23
				QYL	2.44	2.82	3.06	2.22	-0.01	1.93		HEBSL1	5.58	3.85	3.38	-2.33	-2.01	3.04
